# Supplementary material
Source: MDPI journal article supplement (https://www.mdpi.com/2075-163X/10/7/622)
Supplement: s1 [file s1]

## Sheet: Table 1
Table 1. Trace element contents in the pyrite-chalcopyrite crusts. Pobeda vent site.
Fe-Cu
In Cp		V	Mn	Fe%	Co	Ni	Cu	Zn	As	Se	Mo	Ag	Cd	Sn	Sb	Te	Au	Tl	Pb	Bi	U
204-1/4	Py3.	0.17	0.43	45.3	3030	59.8	8500	108	9.1	186	5.2	7.46	1.43	0.39	0.32	1.2	0.133	1.86	5.4	1.54	0.025			V	Mn	Co	Ni	Cu	Zn	As	Se	Mo	Ag	Cd	Sn	Sb	Te	Au	Tl	Pb	Bi	U
204-1/4	Py3.	1.17	0.59	45.7	3040	187	4400	77	21.3	69	9.5	19.3	1.72	0.5	0.517	0.62	0.277	1.68	16.3	2.42	0.38		V	1
204-1/4	Py3.	0.46	0.86	45.4	4810	239	5800	115	13	96	14.8	10.8	0.59	0.62	0.44	1.37	0.171	1.03	12.4	2.43	0.91		Mn	-0.111396	1
204-1/4	Py3.	1.97	3.4	44.6	2960	137.5	15700	374	54.5	124	20.9	9.99	3.6	0.99	1.62	3.8	0.42	1.56	38.3	6.7	1.43		Co	-0.477617	-0.136244	1
204-1/4	Py3.	2.41	0.38	45.8	3690	157	2680	56.4	47.2	126	10.3	4.94	0.54	0.29	1.31	1.9	0.341	0.374	20.2	5.54	0.69		Ni	0.0389689	-0.175313	0.432245	1								Py3
204-1/4	Py3.	2.43	1.16	45.3	4780	305	6600	84	29.1	108	13.1	10.11	0.91	0.35	1.62	0.76	0.324	1.08	27.7	4.06	1.37		Cu	0.143951	0.262353	-0.0814938	-0.157922	1
204-1/4	Py3.	2.29	1.38	45.5	3420	202	5700	77	84.9	103	15.5	10.73	0.87	0.61	1.76	5.9	0.54	1.048	46.9	16	0.91		Zn	0.199814	0.0782646	0.0295231	0.187074	0.412947	1
204-1/4	Py3.	2.81	0.2	45.2	3400	204	9300	204	45	109	21.4	8.45	1.71	0.58	1.63	2.1	0.37	0.83	32.7	6.67	0.81		As	0.786217	-0.148772	-0.560951	-0.0995282	0.0499195	0.0431815	1
204-1/4	Py3.	1.41	5.1	46	3370	181	1530	30.9	25.9	78	13.6	4.65	1.52	0.3	0.68	1.57	0.297	1.11	19.6	4.68	0.64		Se	-0.094612	0.310453	0.412537	-0.00337858	0.0969451	-0.0493173	-0.268687	1
204-1/4	Py3.	1.21	2	44.8	2390	181	14300	309	27.6	78	13.38	15.3	2.44	0.9	0.6	3.7	0.352	1.25	25	4.95	0.87		Mo	0.333272	-0.0346915	-0.330879	-0.0917031	0.181169	0.0860251	0.366444	-0.0547762	1
204-1/4	Py3.	0.86	21.8	46.3	1440	74	590	29	32	69	12.8	4.36	1.3	0.44	0.44	0.89	0.175	1.36	10.3	2.7	0.83		Ag	-0.322589	0.18585	0.399244	0.0120988	0.416624	0.0502996	-0.353388	0.142255	-0.244596	1
204-1/4	Py3.	1.51	1.92	45.2	2950	178.3	9800	249	53.4	101	17.2	7.41	2.52	0.68	1.08	2.8	0.27	0.867	31.9	6.95	2.16		Cd	-0.330476	0.00923784	0.208594	-0.198315	0.56492	0.237671	-0.271021	0.0834552	-0.214175	0.564787	1
204-1/4	Py3.	4.39	4.59	46	1964	67.7	2510	59.9	100.7	164	36	7.27	0.56	0.3	2.24	2.2	0.176	1.07	22.2	3.6	1.1		Sn	0.628061	0.0646879	-0.325462	0.22613	0.407958	0.615514	0.527332	0.0205036	0.332536	-0.182255	0.000940792	1
204-1/4	Py3.	0.19	0.34	45.7	5220	115	1980	208	19.7	311	6.38	4.66	1.74	0.68	0.65	0.31	0.078	1.19	12.2	1.04	0.213		Sb	0.892764	-0.10539	-0.496923	-0.00562901	0.137082	0.258419	0.858481	-0.205363	0.293224	-0.37103	-0.311693	0.671945	1
204-1/4	Py3.	1.63	0.41	45.2	2910	156.4	9500	390	61.7	118	13.8	7.38	2.18	0.82	1.89	6	0.376	1.51	41.3	7.53	0.668		Te	0.0194474	-0.0819739	0.0776425	0.198282	0.321956	0.005238	0.196337	0.0682966	0.382932	0.213512	0.196922	0.107354	-0.0112006	1
204-1/4	Py3.	0.41	0.34	46.1	3040	66.2	253	9.6	4.39	108	78	1.4	0.3	0.23	0.206	0.32	0.123	0.592	4.9	0.69	5.9		Au	-0.284729	0.0585828	0.39582	0.144428	0.320444	0.0236006	-0.145986	0.000743517	-0.22811	0.615413	0.595328	-0.194241	-0.339079	0.492178	1
204-1/4	Py3.	1.62	4	45	1229	49.6	13300	474	90.3	68	40.9	7.23	3	1.09	1.02	1.3	0.48	0.258	65.9	6.34	5.6		Tl	0.574669	-0.0897928	-0.200529	0.296997	0.071917	0.533441	0.305511	-0.0975447	-0.000923451	-0.287127	-0.248669	0.526083	0.524543	-0.0955183	-0.360517	1
204-1/4	Py3.	0.137	65	45.4	2560	137	8200	86	9.1	234	3.94	10.7	0.67	0.63	0.176	1.13	0.274	0.37	6.9	1.8	0.145		Pb	0.489505	-0.069877	-0.105525	0.31071	0.432983	0.357234	0.369159	0.0909073	0.221167	0.00224884	0.156269	0.596733	0.365388	0.412151	0.326786	0.368552	1
204-1/4	Py3.	0.9	0.42	45.8	4080	320	2270	47.4	83	37.5	13.3	3.61	0.43	0.4	0.97	4	0.37	2.2	32.5	3.82	2.25		Bi	0.0897588	-0.0905819	0.202052	0.298164	0.194975	-0.0877928	0.111052	0.186011	0.0165747	0.281292	0.252448	0.0899345	-0.0599464	0.617689	0.686235	-0.127134	0.656692	1
204-1/4	Py3.	0.283	0.7	46.1	1770	115	2560	83	3.6	18.9	11.8	0.75	1.17	0.3	0.249	0.04	0.1	1.69	11.53	0.37	0.522		U	0.375586	0.144532	-0.220662	-0.00607054	0.587867	0.179448	0.176469	0.178582	0.579122	-0.0596597	-0.055033	0.404516	0.237524	0.364031	-0.0700552	0.257173	0.633539	0.237058	1
107-2	Py3.	2.08	1.5	45.8	2128	241	4300	10.9	58.7	116	24.6	3.29	0.37	0.9	1.79	3.3	0.115	3.28	29.1	1.48	9.8
107-2	Py3.	1.42	0.01	46.2	1905	240	331	5.8	55.1	118	17.7	1.44	0.32	1	1.55	3	0.104	0.96	14.91	1.44	1.33
107-2	Py3.	2.1	0.6	46.1	2237	284	1100	28.1	48.2	86.8	22.4	1.12	0.54	1.03	1.98	0.34	0.083	1.03	17.7	0.44	0.97
107-2	Py3.	6.48	1.79	46.2	823	84.4	1417	27.6	171.3	36.3	33.2	1.82	0.07	1.18	7.2	0.53	0.074	2.58	32.5	0.402	0.694
107-2	Py3.	2.92	1.22	46.3	1144	112.2	444	29.6	52.4	46.2	21.5	2.02	0.29	0.5	2.3	0.28	0.061	2.05	24	0.74	0.563
107-2	Py3.	5.17	0.5	46.1	1182	102.7	2660	9.8	131	70.6	97	2.25	0.19	1.39	3.59	2.6	0.012	1.86	17.7	1.52	2.31
107-2	Py3.	2.97	1.16	46	1705	185.9	2270	27.3	94.6	106	270	2.47	0.13	0.95	2.08	6.1	0.145	0.504	33	4.99	36.2
107-2	Py3.	5.46	20.7	42.3	887	93.4	39000	1260	107	90	123	7.2	1.86	2.4	4.83	3	0.154	2.91	56.3	1.99	60
107-2	Py3.	3.56	5.05	46.4	813	72.6	198	24	128	35.4	24.9	0.97	0.025	0.75	3.14	0.34	0.083	3.18	9.7	0.242	0.377
107-2	Py3.	4.71	3.4	45.7	3140	346	2270	2330	59.4	87	32.9	2.51	0.56	2.33	3.64	0.72	0.114	6.17	56.4	1.04	1.13
107-2	Py3.	1.99	2.26	46.1	2271	343	1040	11.3	54.8	124	24.1	3.1	0.51	0.82	1.46	1.94	0.192	2.56	46.2	10.21	1.09
107-2	Py3.	5.99	7.9	44.9	2245	222	13600	42	63.2	208	62.9	4.46	0.39	1.31	2.35	3.9	0.213	3.86	106.6	11.97	75
107-2	Py3.	7.8	2.16	45.8	1810	192	4770	39.9	106.5	125	41	2.01	0.57	1.16	4.3	0.85	0.103	4.55	23.9	2.08	0.89
107-2	Py3.	3.38	0.8	46.3	736	96.3	1340	18.5	67.4	75	26.5	2.79	0.06	0.53	2	0.4	0.083	1.25	11.72	0.84	0.72
107-2	Py3.	5.65	2	46.1	2020	251	1560	32.4	128	143	42.6	2.4	0.58	2.4	4.2	1.37	0.19	1.42	62.1	9.6	0.95
		V	Mn	Fe, %	Co	Ni	Cu	Zn	As	Se	Mo	Ag	Cd	Sn	Sb	Te	Au	Tl	Pb	Bi	U			V	Mn	Fe	Co	Ni	Cu	Zn%	As	Se	Mo	Ag	Cd	Sn	Sb	Te	Au	Tl	Pb	Bi	U
107-2	ISS	0.92	11.6	30.3	1345	31.3	257800	2560	57	1005	27	6.2	9.2	5.3	4	19.2	0.18	1.81	141.3	12.5	1.25		V	1
107-2	ISS	0.89	16	37.5	1462	21.5	208700	1860	3.3	252	1.2	2.5	7.4	8.1	0.17	18	0.41	0.028	4.7	0.34	0.06		Mn	0.504368	1
107-2	ISS	3.7	18	36.7	1636	4.8	235000	3160	5.5	56	1250	2.9	4.2	8.3	0.26	10	0.26	1.8	33.5	9.6	116		Fe	-0.143399	-0.0775304	1
107-2	ISS	0.48	15.3	29.3	1191	82	288000	1690	9.9	634	32.2	28.3	7.3	9.1	2.2	8.7	0.35	29.3	283	0.88	0.53		Co	0.119483	-0.0069468	-0.291202	1							ISS
107-2	ISS	1.23	11	22	11100	1580	386000	1830	63	1710	461	29.9	9.8	13.6	17.5	42	0.33	9.6	525	38.4	5.27		Ni	0.0951162	-0.099295	-0.423456	0.925997	1
107-2	ISS	0.83	15.2	17.5	2160	303	358000	862	23.2	153	48.4	20.6	4.3	4.8	4.9	6.9	0.37	24.5	341	0.61	0.73		Cu	-0.0462791	-0.099924	-0.561157	0.488644	0.46843	1
107-2	ISS	0.5	14.6	37.6	1384	31.3	194500	1820	5.6	363	0.65	9.7	0.7	5.5	0.16	0.8	0.05	0.165	0.4	0.062	0.07		Zn%	-0.0909572	-0.259932	0.0675149	-0.0468467	0.0782388	0.0704828	1
107-2	ISS	0.76	9.4	34.7	1647	9.3	221000	3270	5.5	69	1.2	3	14.6	5.8	0.23	55	0.15	0.075	19.4	0.76	0.016		As	0.199509	-0.021456	-0.364839	0.378491	0.332418	0.314246	-0.0535188	1
107-2	ISS	1.39	9	33.1	1895	55	222700	2800	32	216	6.8	10	14.6	5.8	2.2	6	0.06	4.88	85	2.19	0.16		Se	0.07886	0.298661	-0.0382517	0.343366	0.180139	0.116059	-0.250056	0.379845	1
107-2	ISS	0.5	13.4	35.6	1602	11.5	208600	2880	3.35	88	1	4.8	8.3	11.3	0.43	1.7	0.4	0.65	20.2	0.22	-4.62e-07		Mo	0.535314	0.0879919	-0.170532	0.305151	0.299321	0.172883	-0.0176455	0.106824	-0.017295	1
107-2	ISS	0.42	8	37.6	1556	41.8	192700	2060	0.9	90	0.5	3.07	4.4	7.4	0.29	1.6	0.3	0.31	6.4	0.3	0.058		Ag	-0.161201	-0.29046	0.0930849	0.292334	0.456214	0.319008	0.543088	0.00304236	-0.0732152	-0.036752	1
107-2	ISS	0.32	9.6	36.5	1445	95.7	193900	1693	3.4	44	0.55	11.2	7.4	11.1	0.07	1	0.16	0.25	15.1	0.14	2.14e-06		Cd	-0.418475	-0.395829	0.288509	-0.0503855	-0.0925248	0.180244	0.354964	-0.276265	-0.183031	-0.160107	0.178509	1
107-2	ISS	0.3	12.5	26.4	1204	8	275300	8900	13.4	177	27.9	6.7	5.8	11.9	1.04	1.2	0.42	1.95	78	0.66	3.1		Sn	0.221737	0.423476	0.229691	0.153378	-0.108968	0.024151	-0.253307	0.234728	0.630222	-0.068559	-0.135564	-0.220798	1
107-2	ISS	0.58	8	35.2	1563	2.8	207100	1990	3.3	79	0.7	2.3	9.8	5.7	0.17	12	0.31	0.3	12.7	0.056	0.039		Sb	0.23528	0.051203	-0.584072	0.859959	0.907804	0.530844	0.151741	0.502344	0.253219	0.28692	0.322079	-0.169683	-0.0145161	1
107-2	ISS	0.72	14.5	37.3	1631	15.2	212400	1916	5.5	450	0.8	3	10.3	3.1	0.6	8.5	0.35	0.055	11.6	0.33	8.8e-06		Te	-0.0851127	0.199421	0.146497	0.173744	-0.0215956	0.0404864	-0.203566	0.260663	0.816934	-0.0403117	-0.0992884	-0.0859875	0.613258	0.00618816	1
107-2	ISS	0.11	12	34.4	1592	42	210800	1830	3.9	480	0.42	9.4	11.5	3	1.34	6.5	0.28	0.81	29.9	1.55	9e-06		Au	0.111148	0.192653	-0.0345345	0.0728312	0.00381338	0.0237172	-0.221114	0.360146	0.34683	0.0143723	-0.0635196	-0.28102	0.396602	-0.0036172	0.320072	1
107-2	ISS	1.16	24	32.4	1326	49	199000	1600	5.6	332	1.3	8.5	4.6	10.2	0.27	12.7	0.33	0.23	37	0.18	0.018		Tl	0.0957103	0.0896046	-0.658513	0.186798	0.326031	0.497465	-0.0639878	0.196727	0.0309035	0.124086	0.245364	-0.211444	-0.0876916	0.439938	-0.0844368	0.0555921	1
107-2	ISS	1.8	17	38.4	1534	98	196500	1810	13	1320	1.7	16.7	2.8	5	0.3	48	0.56	0.01	0.44	0.05	2.02e-05		Pb	0.151122	0.0292255	-0.811797	0.645362	0.769463	0.617224	0.0905358	0.421266	0.15838	0.274048	0.293328	-0.214227	-0.1393	0.877909	-0.0722087	0.016297	0.763489	1
107-2	ISS	1.03	13	38.1	1604	51	195700	1840	5.2	91	0.15	10.2	1.2	7	1	1.9	0.13	0.01	2.5	0.16	2.39e-05		Bi	0.211619	0.0737195	-0.285757	0.733279	0.620173	0.42329	-0.157913	0.634578	0.551509	0.373295	0.0667153	-0.165256	0.356966	0.643326	0.350146	0.397239	0.131099	0.498403	1
107-2	ISS	0.82	18	39.1	1609	66.1	186000	1890	3	870	0.95	11.9	7.6	5.4	0.47	32	0.22	0.01	0.42	0.27	1.63e-05		U	0.530918	0.107156	-0.027578	0.0130899	0.00657609	0.0131471	-0.00669139	-0.0141151	-0.0963844	0.95149	-0.117596	-0.150132	-0.0556599	0.0065576	-0.0536119	0.00684107	0.0264285	0.038874	0.168835	1
107-2	ISS	1.19	10	39	1644	13.5	198200	1920	2.9	51	0.85	2.6	14	4.6	0.23	1.6	0.00126	0.01	0.89	0.22	2.84e-05
107-2	ISS	0.43	3	36.7	1702	16.9	199200	1790	6.5	580	2.45	5	8.6	4.4	0.1	19	0.08	0.22	16.2	0.17	3.38e-05
107-2	ISS	0.2	14.8	28.1	1439	73	281000	1477	9.6	1060	2.6	16.7	1.7	6.8	1.15	28.4	0.4	3.56	139	3.09	0.99
107-2	ISS	0.58	7.9	29.1	1460	37.3	283000	6000	24.3	754	4.6	9.2	19.7	10.3	1.12	15	0.00134	1.89	81	2.65	0.5
107-2	ISS	0.8	10	32.7	1609	10.8	240200	2080	6.1	68	15.6	4.4	2.7	10.5	0.35	3.1	0.00221	0.89	59.4	0.89	0.56
107-2	ISS	0.68	26	37.3	1597	24.2	209900	1713	4.9	57	3.1	6.9	8.9	4.5	0.14	13.8	0.08	0.092	6.2	0.17	0.14
107-2	ISS	1.45	19	31.8	1937	69	245000	16300	41	407	24.4	15.8	8.3	11.1	5.4	8.6	0.00372	4.4	170	1.94	0.46
107-2	ISS	0.78	10	36.9	1515	45.6	188000	1860	20	369	0.55	7.3	22	6.6	0.31	11.2	0.25	0.063	9.1	0.29	3.84e-05
107-2	ISS	0.34	21	32.3	1431	21.9	208500	4120	4.8	1140	11	1.2	9	14.1	0.92	31	0.052	1.01	77	1.33	1.6
107-2	ISS	0.62	19	36.1	1323	48	186000	1870	7	60	1.4	8	11.7	7.3	0.28	0.5	0.64	0.08	2.8	0.065	0.017
107-2	ISS	0.48	9.7	36.8	1462	29.1	181700	1885	4.3	1330	0.000426	2.27	12.4	4.8	0.8	22.5	0.07	4.42e-05	1.6	0.19	0.023
37/204-4	ISS	0.04	6.7	39.8	2222	0.9	233600	1611	70.4	1490	3.3	10	6.5	60.2	0.85	121	0.25	0.15	1.8	5.1	0.11
37/204-4	ISS	0.43	18.3	39.3	2148	4.1	236200	1614	7.2	1470	0.65	5.6	9.2	57.4	0.9	94	0.305	0.305	1.5	4.9	0.155
37/204-4	ISS	0.31	21.4	39.6	2234	4.95	232600	1722	4.5	1470	0.75	12.5	8.5	58.1	0.33	121	0.46	0.55	2.3	2.36	0.04
37/204-4	ISS	1.1	24	39.9	2235	4.9	230400	1694	3.4	1340	0.11	10.4	16.5	62.1	0.02	69	1.09	0.29	2.3	12.9	0.195
37/204-4	ISS	1.25	14	39.4	2223	3.2	234000	1770	3.1	1750	0.38	9.6	13	78.5	0.04	94	0.56	0.41	5.2	12.1	0.05
37/204-4	ISS	0.15	15.8	38.4	2156	3.55	245000	1616	32.3	1500	0.98	10.9	8.8	69.6	0.5	77	0.28	0.245	1.1	23.7	0.14
37/204-4	ISS	0.34	13	38.6	2222	1.2	242700	1620	4.55	1740	0.11	8.5	4.4	80.8	0.9	144	0.3	0.47	1.8	2.42	0.1
37/204-4	ISS	0.7	20	39.6	2158	2	233800	1770	1.9	1100	0.455	10.7	12.9	62.6	0.55	20.1	0.29	0.29	3.9	1.51	0.11
37/204-4	ISS	0.07	23	40.8	2239	6.5	223000	2000	6	75	0.05	9.9	6.9	62.8	0.72	5.5	0.81	0.39	4.8	1.29	0.06
37/204-4	ISS	0.24	10.5	39.4	2169	1.6	236400	2085	1.3	760	0.09	10.9	19.7	42	0.17	20.2	0.08	0.35	4	1.61	0.07
37/204-4	ISS	0.6	7.4	36.5	1911	5.5	267500	2020	70	1570	0.91	15.3	6.5	46.9	0.14	103	2.15	0.14	1.5	17.3	0.21
37/204-4	ISS	0.07	22	38.9	2122	2.95	240300	1997	3.4	2000	0.365	10.1	21.4	46.8	0.5	184	0.01	0.27	1.6	1.77	0.023
37/204-4	ISS	0.95	9.4	38.7	2169	2.25	244300	1766	4.2	145	0.65	8.8	18.5	63.9	0.485	0.1	0.32	0.31	2.9	1.45	0.022
37/204-4	ISS	1.6	17	36.3	1966	1.4	267200	1560	70	490	0.46	10.4	4.3	53.9	1.1	26	0.35	0.5	3.75	9	0.3
37/204-4	ISS	3.7	36	37.3	2070	14	258000	1380	9	780	0.6	10.4	1.3	59	2.7	7	0.155	1.55	9	0.5	0.395
37/204-4	ISS	2.1	17	37.1	1979	11.2	260000	1540	7.5	870	0.44	13.1	12.1	68.3	0.65	12	0.24	0.31	4.15	2.3	0.32

## Sheet: Table 2
Table 2. Trace element concentration in sulfides of the pyrite-sphalerite-chalcopyrite crusts. Pobeda vent site-3.
			V	Mn	Fe%	Co	Ni	Cu	Zn	As	Se	Mo	Ag	Cd	Sn	Sb	Te	Au	Tl	Pb	Bi	U			FES2+ZNS+ISS
107-11(2)	Py2.	8.58	100	45.1	620	36.2	11800	1460	214	63.9	136	24.8	1.57	2.1	9.1	0.85	0.91	17	38.1	0.8	10.2			V	Mn	Co	Ni	Cu	Zn	As	Se	Mo	Ag	Cd	Sn	Sb	Te	Au	Tl	Pb	Bi	U
107-11(2)	Py2.	5.11	19.9	43.8	629	38.1	25800	359	207	42.9	101.1	40.2	0.79	2.64	7.06	0.06	0.57	7.9	43.7	2.79	20.7		V	1
107-11(2)	Py2.	4.17	17.5	44.7	953	61.9	16800	136	131.1	41.5	49.2	21.1	0.05	0.88	4.84	0.8	0.34	6.92	47.9	3.77	6.8		Mn	0.00448453	1
107-11(2)	Py2.	6.52	2.4	45.1	1120	75.9	11860	361	105.1	73	68.6	13.8	0.47	6.11	6.16	0.17	0.238	8.15	74.2	2.89	8.76		Co	0.183273	0.0146641	1
107-11(2)	Py2.	6.58	5.3	43.8	1073	79.4	24800	266	190	42.6	119.4	20.4	0.17	1.93	8.66	1.22	0.27	7.24	87.3	2.58	45		Ni	0.289276	-0.130938	0.78512	1
107-11(2)	Py2.	14.01	6.8	43.1	1002	46.2	6400	25300	344	26.9	141.7	14.9	16.6	1.86	11.73	0.82	0.25	5.95	123.3	0.49	40.9		Cu	0.278219	-0.219977	0.244712	0.586748	1
107-11(2)	Py2.	7.71	4.5	44.7	884	27.1	3450	13370	178.8	69.7	75.6	10.93	7	1.35	3.91	0.36	0.28	2.52	47.1	0.82	0.89		Zn	0.213604	0.09331	0.267813	0.260023	0.122346	1
107-11(2)	Py2.	13.8	20.8	44.6	888	44	8410	8680	316	48	182	14.7	12.9	1.96	11.61	0.49	0.199	4.33	89.9	2.2	123		As	0.659932	-0.0232955	0.185192	0.143836	0.224564	0.410909	1
107-11(2)	Py2.	9.3	6.5	45.9	638	59.7	1239	3730	60.7	9.4	20.5	20.3	1.31	0.91	17.7	0.18	0.1	11.95	119.2	0.126	1.52		Se	-0.185657	-0.486166	0.347393	0.36837	0.186979	-0.184614	-0.303716	1
107-11(2)	Py2.	15	7.7	44.1	989	45.9	14790	7700	317	15.4	123.2	32.2	13.5	2.28	14.1	1.03	0.278	3.07	89	1.15	10.3		Mo	0.350707	-0.0138775	0.197811	0.119184	0.358674	0.359886	0.46903	-0.0593546	1
107-11(2)	Py2.	15.4	16	42.6	1109	69.2	26700	9650	346	41	157.4	32.1	17	2.03	12.3	0.9	0.49	8.34	129.9	0.76	5.4		Ag	0.286495	0.427316	0.109043	0.104927	0.202441	0.287007	0.420863	-0.469016	0.275168	1
107-11(2)	Py2.	4.08	3.6	46.2	444	15.5	1440	525	140	38.8	53.4	7.01	0.3	0.39	1.46	1.17	0.129	2.88	27.2	1.81	19.8		Cd	0.305059	0.0621688	0.303116	0.254461	0.222952	0.881604	0.467075	-0.155576	0.494052	0.263956	1
107-11(1)	Py2.	2.18	0.72	46	1810	71.3	1760	740	81	161	59.6	6.71	0.77	0.55	2.89	0.54	0.176	1.42	21.2	0.357	0.639		Sn	0.0341934	-0.0723086	0.196949	0.274017	0.456764	0.264758	0.0855574	0.108552	0.437093	0.121497	0.366826	1
107-11(1)	Py2.	5.38	0.11	46.2	770	30.2	1570	133	86	72	31.8	8.96	0.69	0.43	1.39	0.9	0.066	7.04	8	0.279	1.93		Sb	0.422851	0.576289	0.27806	0.234489	0.0527974	0.326288	0.439597	-0.505672	0.245405	0.795142	0.311367	0.0782369	1
107-11(1)	Py2.	9	0.17	46.4	506	25.8	342	25.1	86.6	21.1	34.6	2.63	0.1	0.19	1.94	1	0.053	1.52	3.21	0.45	5		Te	0.375697	-0.255157	0.121577	0.190787	0.255299	-0.025234	0.200174	0.29562	0.0886536	-0.187412	0.0255081	-0.031945	-0.134745	1
107-11(1)	Py2.	18.8	2.2	44	1950	128.5	21300	740	275	51	54	15.3	0.8	0.44	15.1	0.77	0.182	1.26	45.7	2.12	2.78		Au	0.108518	0.122377	0.218687	0.263097	0.263168	0.726253	0.396647	-0.100939	0.340074	0.315091	0.629772	0.281623	0.251232	-0.0100201	1
107-11(1)	Py2.	24	1.18	45.6	1820	72	6400	163	404	82	52.6	4.34	0.5	0.38	9.15	2.6	0.121	1.23	17.4	1	7.2		Tl	0.000937533	0.71771	-0.156481	-0.331826	-0.316992	0.00714939	0.213136	-0.594785	-0.0735769	0.423994	-0.0321865	-0.226745	0.427775	-0.340394	0.00113014	1
																							Pb	0.193111	0.229722	0.354945	0.2703	0.0332921	0.522694	0.555219	-0.373591	0.39635	0.48083	0.487325	0.207998	0.620774	-0.188712	0.46394	0.218225	1
																							Bi	0.0551328	-0.347882	0.0701734	0.287519	0.558631	-0.173146	-0.0335305	0.373761	0.252432	-0.045966	-0.0957605	0.419461	-0.145717	0.318115	0.0155939	-0.43818	-0.197862	1
		V	Mn	Fe%	Co	Ni	Cu	Zn	As	Se	Mo	Ag	Cd	Sn	Sb	Te	Au	Tl	Pb	Bi	U		U	0.333825	-0.0781042	0.0225003	0.0752354	0.305007	0.0553534	0.171023	0.044521	0.701659	0.0491494	0.139115	0.236509	0.0658878	0.1135	0.00138692	-0.170923	0.0289882	0.317809	1
107-11(2)	Py3.	3.51	21.7	46.2	867	43.7	1650	54.2	74.8	34.8	37.7	4.18	0.51	0.66	2.72	0.49	0.07	4.18	19.9	0.95	5
107-11(2)	Py3.	3.48	7.9	46.3	885	35.8	1410	21.6	64.7	43.8	34.4	4.84	0.1	0.5	1.68	0.21	0.074	2.07	14.9	0.226	5.3
107-11(2)	Py3.	1.27	1.13	46.3	386	24.2	1930	49.3	20.8	28	16.9	5.07	0.09	0.46	0.8	0.85	0.057	1.96	11.35	0.202	0.511
107-11(2)	Py3.	2.76	1.57	46.4	628	20.4	218	5.2	37.7	26.4	33	1.7	0.041	0.36	0.58	0.032	0.083	1.58	3.8	0.114	2.05
107-11(2)	Py3.	2.27	6.2	45.8	605	39	6520	132.2	59.9	30.6	38.5	10.97	0.27	1.08	2.08	0.19	0.142	3.53	23.4	1.62	3.21
107-11(2)	Py3.	6.67	2.4	44.8	1025	38.7	14740	671	145.6	61.6	295	30.1	0.51	0.9	7.59	0.75	0.37	5.31	52.9	3.38	86.4
107-11(2)	Py3.	6.55	3	45.5	1196	58.6	7450	494	179	69.4	52.9	23.9	0.59	1.86	18.7	0.34	0.39	4.08	112	3.8	4.56
107-11(2)	Py3.	3.78	11.4	45.8	883	35.1	5820	71	44.1	50.7	35.1	6.39	0.34	0.41	1.86	0.33	0.115	2.87	15.6	0.406	1.79
107-11(2)	Py3.	2.92	3.2	45.6	829	56	7570	178	10.3	43.4	17	10.17	0.59	0.64	1.67	0.55	0.085	2.05	16.8	0.79	0.378
107-11(2)	Py3.	2.01	2.16	46.3	908	31.9	840	12.8	35.1	74.3	19.6	5.48	0.046	0.32	1.15	0.032	0.109	1.36	6.88	0.142	0.351
107-11(2)	Py3.	1.76	3.2	46.3	1436	74.5	925	8.1	13.5	127	21	9.9	0.2	0.58	1.55	1.29	0.067	0.96	16.8	1.48	0.98
107-11(2)	Py3.	4.95	2.12	44.4	915	51.3	19000	460	69.8	42.7	68.3	14.5	0.65	4.04	2.46	0.4	0.068	0.7	27.6	1.26	37.8
107-11(2)	Py3.	1.48	2	46	1003	47.3	3550	92	35.6	105	39	6.73	0.39	0.46	1.55	0.19	0.123	4.7	10.5	0.359	23.9
107-11(2)	Py3.	2.98	2.7	45.7	816	43	6490	88.9	59.7	77	90	9.76	0.21	0.45	3.2	0.03	0.089	2.75	16.6	0.61	10.7
107-11(2)	Py3.	7.01	3.1	44.4	596	41.3	19400	307	146.6	18.1	42.4	21	1	0.93	8.6	1.41	0.35	4.11	66.3	2.39	1.15
107-11(2)	Py3.	3.73	3.5	45.3	576	24.8	2840	8290	109.2	20.3	124	7.89	5.4	2.02	5.37	1.07	0.221	1.57	78.8	0.291	1.02
107-11(2)	Py3.	1.61	0.35	46.2	1216	14.7	1220	122	37.3	31.9	22.4	4.48	0.08	0.37	0.32	0.8	0.059	0.79	7.51	0.087	0.44
107-11(2)	Py3.	4.8	2.04	46.2	551	22.5	1400	1120	13.8	13.4	22.6	4.43	1.29	0.35	1.45	0.19	0.037	3.41	11.08	0.111	0.286
107-11(1)	Py3.	12.6	1.41	45.5	1107	66.9	8060	540	211	90	41.3	14.3	1.24	0.44	4.39	2	0.235	0.86	30.2	1.22	7.5
107-11(1)	Py3.	17.3	3.8	45.7	777	53.8	6300	720	260	35.8	79	8.95	0.61	0.36	6.01	0.13	0.161	0.87	23	0.458	28.2
107-11(1)	Py3.	14.26	1.67	44.6	843	67	18100	213	323	52.8	66.6	12.85	0.36	0.47	6.21	2.5	0.173	1.27	39.8	1.41	17.6
107-11(1)	Py3.	5.47	5.14	42.1	1786	133.8	38200	4200	162	80	48.2	20.1	3.4	1.62	10.1	0.08	0.38	2.56	117	0.77	4.6
107-11(1)	Py3.	4.75	0.65	45.9	729	38.6	5410	136	75.1	41.8	12.8	8.77	0.33	0.5	1.28	0.1	0.132	0.607	13.5	0.347	2.12
107-11(1)	Py3.	19.2	4.88	44.3	746	54.2	19900	605	303	28.9	235	20.2	0.24	1.01	10.3	0.9	0.199	1.71	47.8	1.34	190
107-11(1)	Py3.	18.1	0.59	45.3	637	60.1	10900	206	276	29.7	48	9.12	0.27	0.51	6.84	0.65	0.103	1.06	31.4	1.17	3.42
107-11(1)	Py3.	4.57	0.06	46.4	1236	55.7	127	10.5	8.9	73.8	11.3	2.16	0.11	0.08	0.69	0.31	0.069	0.124	11.73	0.012	0.316
107-11(1)	Py3.	7.97	1.69	43.8	1480	96.8	15400	9900	79.4	74	68.5	15.8	3.4	0.87	5.9	0.96	0.176	1.89	79.9	1.26	32
107-11(1)	Py3.	6.45	1.21	46.1	1127	63.6	1410	762	133	48	44.8	4.1	0.76	0.1	1.38	0.195	0.046	1.9	13.7	0.553	1.24
		V	Mn	Fe%	Co	Ni	Cu	Zn	As	Se	Mo	Ag	Cd	Sn	Sb	Te	Au	Tl	Pb	Bi	U
107-11(1)	Py1,2 (4).	6.86	182	46.3	692	19.5	690	287	93.7	0.3	18.9	18.4	0.155	0.18	7.01	0.139	0.136	93.8	23.1	0.0032	2.35
107-11(1)	Py1,2 (4).	9.95	37.1	46.3	435	10.9	1070	216	283	4.2	55.1	32.4	0.095	0.1	11.79	0.36	0.105	72.8	5.51	0.008	1.98
107-11(1)	Py1,2 (4).	6.1	84	45.8	832	28.1	3180	2070	195	2.4	46.4	19.4	0.66	0.2	13.2	0.139	0.138	105.7	36.2	0.009	1.92
107-11(1)	Py1,2 (4).	11.1	76.9	46.1	272	11.4	2790	631	80.3	0.85	36	25.5	0.05	0.07	12.6	0.139	0.134	63.2	12.6	0.0034	3.46
107-11(1)	Py1,2 (4).	9.34	66	46.2	514	14.5	1650	252	134	0.165	42.5	39.1	0.15	0.26	13.21	0.139	0.199	67.7	21.6	0.0036	3.7
107-11(1)	Py1,2 (4).	9.71	149	46.2	1113	64.4	910	234	35.6	0.5	30.1	50.2	0.075	0.45	35.6	0.28	0.4	31.9	209	0.005	15.7
107-11(1)	Py1,2 (4).	12.5	43	44.6	1178	57.7	5190	12400	219	4.3	47.7	66.4	4.7	0.49	24.6	0.139	0.37	37.3	247	0.006	2.56
107-11(1)	Py1,2 (4).	9.21	45.3	41	1563	88.9	13800	39000	452	12.1	159	31.5	24	2.27	14.6	0.5	3.1	23.4	311	0.019	6.2
107-11(1)	Py1,2 (4).	9.93	54.4	45	1239	58.4	2580	10000	313	5.8	82.5	21.1	6.6	0.52	15.8	0.305	0.58	33.8	325	0.008	3.32
107-11(1)	Py1,2 (4).	5.9	160	44.8	856	48.4	5800	10300	92.5	2	41.5	31.7	2.68	0.86	26.2	0.65	0.168	42.6	99	0.0085	5.8
107-11(1)	Py1,2 (4).	3.36	129.9	46.3	241	10.9	770	340	26.1	2.2	8.5	6.7	0.095	0.15	4.3	0.139	0.092	148	13.7	0.0034	0.57
107-11(1)	Py1,2 (4).	9.37	29.5	44.3	1680	101.8	8300	11300	314	8.7	77	40.5	5.8	1.07	14.1	0.139	0.47	36	312	0.0075	2.88
107-11(1)	Py1,2 (4).	7.92	17.5	46	863	28	830	2160	471	5.1	90.4	22.2	0.54	0.42	12.96	0.62	0.212	52.5	245	0.0034	5.2
107-11(1)	Py1,2 (4).	7.71	9.3	45.6	796	26.8	2970	3700	489	10.2	113.5	14.77	2.5	0.83	12.6	0.139	0.56	34.3	475	0.011	3.84
107-11(1)	Py1,2 (4).	9.4	58.1	46.1	920	24	1660	1030	227	2.6	64	29.3	1.23	1.17	11.9	0.139	0.172	54.3	77	0.0037	4.9
107-11(1)	Py1,2 (4).	8.38	16.8	45.6	579	19.8	7700	437	391	5.6	70.7	38.1	0.62	0.16	12.6	0.75	0.18	65.6	15.7	0.011	1.9
107-11(1)	Py1,2 (4).	8.72	23.5	46.2	962	27.1	810	304	350	0.3	53.8	35.4	0.17	0.24	13.28	0.139	0.133	78.1	50	0.0085	1.79
107-11(1)	Py1,2 (4).	8.64	36.5	46.1	729	25	1220	1400	388	2.5	58.1	32.1	1.02	0.13	14.38	0.139	0.156	55.4	110	0.0032	1.89
107-11(1)	Py1,2 (4).	9.5	25.9	45.3	599	40.6	4000	6320	328	10	88.8	31.2	4.7	0.23	16.5	0.139	0.168	62.1	267	0.0049	2.08
107-11(1)	Py1,2 (4).	6.96	134.3	45.5	2230	84.4	3180	3710	221	4.1	61.7	29.3	6.5	0.63	24	0.365	0.166	76.3	182	0.005	0.74
107-11(1)	Py1,2 (4).	9.6	96	45.2	1920	58.3	4100	5700	217	4.1	280	27.2	8.4	3.2	19.5	0.139	0.24	50.2	346	0.004	59
		V	Mn	Fe	Co	Ni	Cu	Zn%	As	Se	Mo	Ag	Cd	Sn	Sb	Te	Au	Tl	Pb	Bi	U
107-11(1)	ISS	0.75	4.3	41.2	2184	330	217100	25200	2	209	11.6	58.8	20.4	10.4	4.1	9.9	0.11	0.89	102.1	0.026	0.29
107-11(1)	ISS	0.21	8.5	42.5	2164	204	220200	3860	3.8	187	5.3	39.3	6.8	10.8	0.79	2.25	0.06	0.05	1.25	0.5	0.63
107-11(1)	ISS	0.25	4.9	43.6	2576	309	215500	3480	1.5	197	1.9	45.4	6.5	9.5	0.67	10.7	0.14	0.16	2.4	0.34	0.46
204-1/4	ISS	0.03	6.5	36.9	1156	10	273000	3630	1.6	125	0.245	16.01	20.6	2.13	0.115	3	0.05	0.0255	0.17	0.178	0.015
204-1/4	ISS	0.13	11.6	38.6	1493	17.4	253400	6690	0.7	401	5	16.26	26.9	3.6	0.05	16.3	0.06	0.018	2.4	0.23	1.3
204-1/4	ISS	0.09	12	38.8	1469	22.1	251100	6170	3.4	471	3.4	17.24	26.1	2.88	0.029	10.4	0.25	0.009	0.41	0.51	0.027
204-1/4	ISS	0.29	10.9	36.8	1689	21.8	272700	4370	0.5	318	0.075	18.41	20.7	2.66	0.095	16.5	0.13	0.03	0.12	0.023	0.0185
204-1/4	ISS	0.25	7.9	41.5	1786	57	226000	5130	20.3	372	22.8	15.14	23.1	2.08	0.7	10.9	0.153	0.4	9.5	1.57	0.71
204-1/4	ISS	0.15	9	39.5	1619	27.7	244000	6130	6.1	25	7.8	14.87	23.5	5.16	0.17	0.65	0.041	0.29	6.9	0.46	0.82
204-1/4	ISS	0.165	9.5	38.6	1476	15.7	253600	5940	0.4	4.3	0.05	15.06	19.5	10.5	0.07	0.65	0.15	0.004	0.66	0.036	0.022
204-1/4	ISS	0.18	8.4	39.1	1376	12.4	249700	5700	0.77	99	0.075	15.34	21.6	2.46	0.007	1.2	0.105	0.003	0.22	0.052	0.0275
204-1/4	ISS	0.03	8.7	37.6	1507	10.67	266300	4347	0.7	221	1.42	15.02	20.9	2.29	0.0415	15.2	0.126	0.033	1.83	0.138	0.66
204-1/4	ISS	0.04	8.1	37.8	1667	16	264100	4343	0.155	349	0.085	16.54	19	2.66	0.08	22.7	0.14	0.0165	7.3	1.26	0.015
204-1/4	ISS	0.185	9.4	37	1597	16.5	271700	3934	0.57	276	0.075	15.96	19.6	2.47	0.051	19	0.044	0.0195	0.13	0.103	0.0105
204-1/4	ISS	0.1	9.7	36.2	1898	10.6	278500	4880	0.74	242	4.7	13.09	19.5	1.83	0.113	14.4	0.054	0.233	2.64	0.243	0.026
204-1/4	ISS	0.155	9.2	36.5	1315	15.9	278700	3446	0.8	110	0.075	15.11	13.9	2.04	0.0275	1.5	0.121	0.026	0.1	0.024	0.018
204-1/4	ISS	0.12	9.5	38.7	1860	17.6	254900	4330	1.65	110	0.075	14.83	20.4	2.17	0.022	1.9	0.086	0.01505	0.38	0.095	0.0185
204-1/4	ISS	0.12	9.5	38.2	2022	25.1	258100	4710	1.15	238	4.3	16.32	16.3	2.28	0.008	8.8	0.1	0.085	1.73	0.141	0.003
204-1/4	ISS	0.25	9.9	39	2031	26.7	250700	5000	0.4	268	0.5	15.84	19.1	2.83	0.015	25.8	0.086	0.044	1.14	0.232	0.006
204-1/4	ISS	0.05	8.9	37.9	1730	31.1	263500	3311	0.6	223	0.075	17.44	16.9	1.72	0.085	14.6	0.068	0.038	0.05	0.053	0.0215
204-1/4	ISS	0.11	8.7	37.1	1964	26.2	270400	5490	1.5	246	6.2	17.63	22.6	2.46	0.21	10.2	0.002	0.41	5.2	0.38	0.075
204-1/4	ISS	0.01	9	38.5	1808	35.5	257400	4291	0.3	177	0.075	17.45	17.1	2.28	0.105	36.8	0.105	0.0235	0.08	0.143	0.015
204-1/4	ISS	0.25	8.2	38.8	1955	34.3	252200	4581	0.25	152	0.075	15.71	17	2.34	0.0275	8.5	0.149	0.006	0.12	0.066	0.025
'Source file'		V	Mn	Fe	Co	Ni	Cu	Zn%	As	Se	Mo	Ag	Cd	Sn	Sb	Te	Au	Tl	Pb	Bi	U			V	Mn	Fe	Co	Ni	Cu	Zn%	As	Se	Mo	Ag	Cd	Sn	Sb	Te	Au	Tl	Pb	Bi	U
107-11(2)	Wrtz	0.62	69.9	10.96	603	6.2	3440	55.6	56.2	69	17.1	11.8	461	142	154	0.59	0.37	0.108	116.8	0.015	0.82		V	1
107-11(2)	Wrtz	0.033	81.1	7.321	124.6	0.28	4330	59.1	206.6	6.9	0.023	19.17	756	8.62	419.7	0.255	0.055	0.002	869	0.0335	0.008		Mn	0.0135445	1
107-11(2)	Wrtz	0.048	44.1	8.26	247.6	0.55	6788	58	106.6	9	0.028	20.89	781	8.91	361.5	0.6	0.09	0.011	201.3	0.0205	0.09		Fe	0.316546	0.515729	1
107-11(2)	Wrtz	0.33	42.5	8.09	334	14.1	15300	57.3	146.5	26.1	16.2	32.8	417	9.9	181.2	0.9	1.75	2.54	354	0.049	5		Co	0.191686	0.273964	0.74425	1
107-11(2)	Wrtz	0.006	51.8	6.554	174.5	0.09	3367	60	213	4.2	0.042	16.3	605	8.14	316.2	1.3	0.32	0.015	404	0.023	0.125		Ni	0.285692	-0.101073	0.4644	0.617736	1
107-11(2)	Wrtz	0.17	68.6	16.9	1024	47	43900	45.5	46.3	96	22.3	18.5	568	164.5	79.1	0.24	0.74	0.015	54.2	0.031	0.25		Cu	0.115431	-0.298184	0.247759	0.435893	0.845165	1
107-11(2)	Wrtz	0.08	77.2	11.63	729	28	9900	54.2	56.8	43	0.22	12.6	574	254	139.7	0.84	0.036	0.08	88.4	0.06	0.085		Zn%	-0.315389	-0.395937	-0.970993	-0.786695	-0.630043	-0.471308	1
107-11(2)	Wrtz	0.03	95.7	10.83	283.5	0.22	165	56.1	1.7	11.9	0.16	0.18	1089	40.7	0.17	0.55	0.038	0.06	0.38	0.009	0.0275		As	0.45397	-0.389995	-0.541315	-0.475523	-0.0394881	0.00710012	0.491495	1
107-11(2)	Wrtz	0	110.3	10.32	521	0.99	2560	56.4	8.6	21.2	1.05	9.11	883	11.6	6.09	1.8	0.138	0.33	26.6	0.007	0.27		Se	0.119918	0.0357817	0.426551	0.693271	0.698715	0.581444	-0.52972	-0.195863	1
107-11(2)	Wrtz	2.03	56.9	8.58	188	4.5	3710	58	249	6.5	10.9	14.5	425	5.19	224	0.75	0.1	0.98	490	0.038	0.81		Mo	0.46669	-0.133965	0.338227	0.197711	0.179836	0.0979681	-0.323585	0.108569	0.309619	1
107-11(2)	Wrtz	7.8	84.7	14.4	413	16.7	8800	51.6	284	13.6	39	30.8	320	6.7	122.5	0.55	0.15	2.16	558	0.02	1.03		Ag	0.2503	-0.704298	-0.495128	-0.321997	0.125982	0.381474	0.355968	0.604485	-0.0304208	0.178306	1
107-11(1)	Wrtz	1.09	75.7	13.74	712	4.6	9400	52.2	21.9	42.5	17.8	11.8	765	109	115	0.27	5.1	0.099	67.2	0.0013	0.345		Cd	-0.143271	0.129213	0.132962	0.154286	-0.0390972	0.086556	-0.158911	-0.264936	-0.0785249	-0.354156	-0.0906425	1
107-11(1)	Wrtz	0.503	102.4	14.93	1290	2.25	3960	51.6	0.35	20.8	0.92	2.08	540	2.54	2.13	0.14	0.015	0.023	2.81	0.00275	0.016		Sn	0.055511	0.042257	0.390244	0.610616	0.535051	0.390408	-0.464474	-0.285936	0.595028	-0.0956389	-0.115438	0.575067	1
107-11(1)	Wrtz	1.75	77.3	17.76	977	31.6	22900	46.7	12.5	41.8	2.53	11.06	1449	212	140.8	0.13	0.75	0.033	62	0.0095	0.036		Sb	-0.0444255	-0.294616	-0.276065	-0.155952	-0.101105	0.0889542	0.213632	0.310547	-0.144643	-0.184575	0.35207	0.705197	0.371663	1
107-11(1)	Wrtz	1.2	73.7	14.84	807	1.44	4880	51.4	26.4	25.2	0.063	9.25	1849	256.2	354.7	0.13	0.052	0.0021	41.3	0.0085	0.0043		Te	0.0122348	0.113732	-0.256943	-0.0637037	0.0125144	-0.151693	0.274977	0.208384	0.122708	-0.0583446	-0.0537046	-0.190115	-0.0559495	-0.135975	1
107-11(1)	Wrtz	0.134	67.3	10.15	256.5	0.97	8260	55.9	96.9	6.5	0.46	22.5	992	22.6	296	0.13	0.365	0.027	229	0.0007	0.054		Au	0.0988066	-0.175354	0.113315	0.225737	0.175136	0.22828	-0.156486	-0.0717352	0.327866	0.221919	0.0728436	-0.0462896	0.128851	-0.0353927	-0.00431474	1
107-11(1)	Wrtz	0.077	102.1	11.43	231.6	0.62	16800	53.7	99.8	4.2	0.046	20.01	1569	49.3	496	0.13	0.026	0.041	215	0.0017	0.0065		Tl	0.621587	-0.245691	-0.00907004	-0.0267936	0.22936	0.135976	-0.0178157	0.48856	0.0534285	0.491539	0.390628	-0.361858	-0.205767	-0.115373	0.242941	0.247949	1
107-11(1)	Wrtz	0.145	39.3	6.96	185	2.04	13200	58.6	94.6	8.4	17.4	26.7	488	8.93	111.3	0.33	0.051	0.063	168.3	0.013	0.45		Pb	0.270831	-0.316271	-0.555698	-0.495291	-0.0949581	-0.0286799	0.513299	0.866839	-0.249121	0.0969733	0.583268	-0.224007	-0.328788	0.290387	0.0294774	-0.0551585	0.361728	1
107-11(1)	Wrtz	0.067	54.8	10.45	280	0.78	7220	55.7	51.7	2.9	0.0445	23.1	798	5.51	178	0.185	0.168	0.0172	136	0.0055	0.0055		Bi	0.209643	0.0425773	0.325787	0.139243	0.109698	-0.0637957	-0.273454	0.0378626	0.24382	0.825866	0.00452715	-0.341945	-0.0486903	-0.185376	0.0726952	0.0154022	0.314386	0.0507474	1
107-11(1)	Wrtz	0.66	69.4	12.53	579	1.01	5630	53.5	46.5	12.8	0.5	15.75	2116	255	783	0.14	0.095	0.055	91.3	0.00455	0.022		U	0.181657	-0.348527	-0.166088	-0.0487029	0.20216	0.196573	0.109452	0.292471	0.127635	0.225227	0.346893	-0.322628	-0.144268	-0.0998022	0.255325	0.33693	0.838331	0.221395	0.145824	1
107-11(1)	Wrtz	0.004	66.2	6.62	103.6	0.088	4680	59.8	121	1.9	0.04	29.7	592	5.05	137.9	0.13	0.002	0.0076	634	0.0075	0.006
107-11(1)	Wrtz	0.056	68.7	9.17	171.8	0.49	4050	57.3	111.2	2.1	0.042	14.9	705	6.47	192.6	0.13	0.139	0.016	265	0.00345	0.00345
107-11(1)	Wrtz	0.67	45.1	9.15	255	0.86	14200	56.3	62.6	2.8	3.9	29	748	6.9	187	0.13	0.029	0.0076	176.4	0.007	0.134
107-11(1)	Wrtz	0.048	37.8	8.59	221	0.361	6160	57.7	69.7	2.6	0.14	28.5	602	9.7	126.1	0.135	0.056	0.0171	143.6	0.0014	0.0002
107-11(1)	Wrtz	0.083	74.4	9.34	189	0.421	4690	57.1	90.5	3.4	0.021	16.22	821	6.61	215.9	0.195	0.106	0.0139	340.7	0.005	0.00345
107-11(1)	Wrtz	0.32	51	11.51	337	6.6	10900	54.3	66.6	5.5	9	23.88	843	7.63	205.3	0.13	0.37	0.34	206	0.0024	0.6
107-11(1)	Wrtz	0.343	61.3	10.77	383	0.62	4000	55.6	61.9	6.9	0.005	15.9	1761	94.6	601	0.38	0.94	0.0014	138.2	0.0005	0.007
107-11(1)	Wrtz	0.31	61.4	10.46	326.4	3.33	9570	55.4	74	6	2.82	17.96	1192	47.8	344	0.28	0.67	0.217	158.7	0.0105	0.034
107-11(1)	Wrtz	0.072	79.6	10.37	263	0.38	4850	56	110.7	3.9	0.031	16.15	1161	11.8	311.8	0.135	0.019	0.0039	389	0.0018	0.00495
107-11(1)	Wrtz	1.36	36.4	11.7	490	19.5	18600	53.4	80	5.9	34	15.07	491	5.33	106	0.13	1.55	1.52	324	0.008	1.94
107-11(1)	Wrtz	1.31	75	17.9	967	38.5	27500	46	19.3	28.3	0.072	15.65	1339	187.4	317	0.305	0.301	0.013	62.5	0.0055	0.0037
107-11(1)	Wrtz	0.36	100.2	15.5	329	0.78	189	51.5	11.5	3.4	10.1	1.84	423	3.86	1.54	0.13	0.026	0.092	14.7	0.088	0.32
107-11(1)	Wrtz	0.094	109.5	16.13	473	0.13	241	50.7	0.27	8.5	0.28	0.795	806	14.02	0.8	0.6	0.05	0.003	0.91	0.044	0.055
107-11(1)	Wrtz	0.07	99.8	13.86	331.8	0.11	138.7	53.1	0.04	4.3	0.16	0.425	705	7.51	0.033	0.6	0.06	0.0135	0.19	0.008	0.027
107-11(1)	Wrtz	0.045	66.2	11.38	318	0.37	1056	55.4	45.1	7.3	15.2	6.07	418	8.3	124.2	0.13	0.088	0.0046	66.6	0.013	0.218
107-11(1)	Wrtz	2.44	70	18.4	719	7.39	4820	48.1	57.6	38.7	131	19.4	388	19.2	104.1	0.22	0.74	1.07	216	0.227	0.324
107-11(1)	Wrtz	0.08	100.4	16.79	465.6	0.12	161.8	50.1	0.65	3.2	0.058	0.679	483	3.71	2.4	0.13	0.0385	0.02	3	0.016	0.0125
107-11(1)	Wrtz	0.09	96	14.19	367.9	0.135	217.7	52.7	0.6	1.5	0.11	0.545	880	14.81	0.095	0.13	0.041	0.0026	0.182	0.002	0.0075
		V	Mn	Fe, %	Co	Ni	Cu	Zn	As	Se	Mo	Ag	Cd	Sn	Sb	Te	Au	Tl	Pb	Bi	U
107-11(1)	Bo	1.87	19	35.1	2008	193.1	181600	130700	45.3	85	133	63	86.9	8.4	14.5	0.45	0.42	1.14	161.5	0.39	14.3
107-11(1)	Bo	0.89	26.9	24.5	1723	144.9	218500	217600	49.2	127	50.6	75	136	11.5	18.6	4	0.48	4.7	311	0.077	9.9
107-11(1)	Bo	9.39	14.5	39.6	2000	134.5	105000	101000	405	97	764	67.3	65.9	6.4	32.4	9.6	0.51	6.16	150	3.01	400
107-11(1)	Bo	2.47	28.4	28.7	1658	167.8	176400	220400	101.5	92	61.8	106.6	179	14.8	36.2	0.36	0.64	7.64	404	0.098	2.45
107-11(1)	Bo	3.2	27.8	29.9	1844	133.1	154000	214000	115	116	58.8	90.7	187	10.7	39.9	2.9	0.6	6.3	283	0.41	11.6
107-11(1)	Bo	4.04	19.5	36.4	1930	124	103000	157000	202	65	62	74	97	8.2	29.4	0.63	0.43	3.46	135	0.93	1.34
107-11(1)	Bo	1.5	20.2	32.3	1742	88.6	188000	154000	39	95	29.9	74.2	122	8.6	19.7	2.8	0.15	2.81	152	0.067	1.38
107-11(1)	Bo	5.21	30.5	30.5	1679	128.8	115200	228000	204	117	113.7	87.7	274	15.8	67.3	1.4	0.64	5.13	222	0.248	33.5
107-11(1)	Bo	4.08	48	25	3150	580	194000	212000	194	109	154	141	117	11.1	60	1.5	0.41	43	447	0.35	41
107-11(1)	Bo	8.73	26.3	30.4	1707	177	159100	177000	291	100	372	97.4	61.7	17.2	50.6	4.5	0.87	7.4	308	1.45	152
		V	Mn	Fe	Co	Ni	Cu, %	Zn	As	Se	Mo	Ag	Cd	Sn	Sb	Te	Au	Tl	Pb	Bi	U
107-11(1)	Dig	3.09	24.7	49000	2750	431	65.4	22600	142	117	370	166	12.6	13.1	67.9	0.51	0.98	27.5	202	0.24	121
107-11(1)	Dig	3.1	27.3	20000	2290	481	71.8	7300	174	142	530	178.6	9.4	13.3	70.1	3.3	1.3	19.2	314	0.379	263
107-11(1)	Dig	3.5	20.3	200000	2180	333	48.1	5500	185	111	176	125	5.5	8.04	42.6	1.9	0.78	7.72	180	0.72	221
107-11(1)	Dig	3.33	17.9	153000	2310	367	51.7	13600	182	97	403	116.1	7.8	7.03	45.3	1.3	0.99	11.74	146.1	0.41	34
107-11(1)	Dig	12.6	9.9	350000	1290	150	25.8	26500	277	71	104	118	12.3	5.75	27.6	0.79	0.38	3.99	107.8	1.25	39.9
107-11(1)	Dig	2.07	20.8	14600	2490	499	69.8	18700	116	116	128.4	209.9	17.4	10.01	57	0.74	0.61	12.1	244	0.109	2.03
107-11(1)	Dig	2.47	17.9	56000	1930	310	63.3	37600	133	95	246	110.9	23.2	12.16	54.8	1.18	0.53	10.9	227	0.146	35.6
107-11(1)	Dig	2.13	22.5	13400	1421	147.8	68	46900	95.7	114	340	139.3	29.9	9.74	37.1	2.7	0.58	9.69	193	0.137	74
107-11(1)	Dig	5.2	22.5	111000	1770	170	55	37500	214	104	171	103.8	24.1	11.4	43.2	3.2	0.53	10.45	235	0.326	45
107-11(1)	Dig	2.65	25.3	39500	1612	201	60.2	82800	155	117	244	181.8	51.2	12.3	67	1.7	1.44	27.5	367	0.061	182
107-11(1)	Dig	4.28	25.8	62800	1966	259	49.3	140500	236	171	196	126.6	123.1	17.3	72.3	2.5	1.24	18.89	1035	0.261	16.8
107-11(1)	Dig	2.77	44.4	55700	1850	195	43.3	192000	910	165	285	232	185	21.1	103	1.2	5.22	18.5	790	0.109	1.99
107-11(1)	Dig	2.43	54.7	57500	944	65.6	36.8	286000	493	129	345	297	318	36.3	99.4	0.65	1	17	867	0.24	1.7
107-11(1)	Dig	8	25.3	33200	1780	241	60.5	94600	144	175	409	135	42.1	30.6	57.2	0.7	0.95	16.3	408	0.144	14
107-11(1)	Dig	1.81	22.4	38200	2640	297	56.6	103600	130	151	89	172.4	41.6	10.37	62.3	1.9	0.71	18.5	212	0.027	6.5
107-11(1)	Dig	2.01	23.2	44300	2170	275	58.5	96800	127	143	139	126.8	66.3	15.9	52.7	1.2	0.78	13.9	333	0.03	26.9

## Sheet: Table 3
Table 3. Trace element contents in sulfides of third style pyrite crusts. Pobeda vent site. (sample-196)
	№foto			V	Mn	Fe%	Co	Ni	Cu	Zn	As	Se	Mo	Ag	Cd	Sn	Sb	Te	Au	Tl	Pb	Bi	U
37L-196-g-2''	57	Greigite		4.1	85	56.6	19.7	6.9	1660	940	1284	1.8	128	25	5.3	3.8	1.8	0.205	0.7	1.1	119	0.0049	1.2
	№foto			V	Mn	Fe%	Co	Ni	Cu	Zn	As	Se	Mo	Ag	Cd	Sn	Sb	Te	Au	Tl	Pb	Bi	U
37L-196-g-1''	16	Py12por		3.4	17	46.2	11.4	5.23	2050	1000	186	5.9	105.5	11.78	1.1	2.89	0.98	0.33	0.226	4.57	79.7	0.0079	2.54						V	Mn	Fe, %	Co	Ni	Cu	Zn	As	Se	Mo	Ag	Cd	Sn	Sb	Te	Au	Tl	Pb	Bi	U
37L-196-g-1''	18	Py12por		2.9	9.1	46.3	7.76	2.41	629	1100	64.5	3.8	36.3	4.86	3.18	0.83	0.57	0.105	0.168	3.94	28.3	0.0089	1.39					V	1
37L-196-g-1''	19	Py12por		3.92	51.5	46.1	2.55	1.32	400	3090	114	0.75	83	2.37	7.6	2.57	0.85	0.105	0.063	7.61	14.7	0.0035	5.1					Mn	-0.194085	1
37L-196-g-1''	20	Py12por		2.53	63.8	46.3	0.97	0.81	578	1400	264	2.9	65	4.81	3.73	0.87	0.99	0.105	0.265	7.66	27.3	0.0009	1.44					Fe, %	-0.058917	0.132254	1
37L-196-g-1''	21	Py12por		5.14	31.2	46	2.87	2.97	698	4350	249	3.8	137	5.8	8.8	1.57	1.23	0.105	0.153	4.82	31.7	0.0082	38.1					Co	0.289748	-0.145104	-0.0746342	1
37L-196-g-1''	22	Py12por		5.14	25.3	45.8	1.57	1.33	638	5980	105.7	0.92	70.5	6.6	12.2	6.6	0.66	0.105	0.216	4.46	27.1	0.0105	32					Ni	0.167916	0.0113077	-0.0724994	0.940107	1
37L-196-g-1''	23	Py12por		4.62	16.1	46.4	1.79	1.85	904	199	104.8	3.5	69.3	9.57	1.06	0.44	0.81	0.17	0.219	4.57	40.3	0.0073	9					Cu	0.249733	0.0416042	-0.356065	0.180421	0.183599	1
37L-196-g-1''	24	Py12por		4.22	19.8	46.4	1.66	2.6	903	510	75.4	1.7	33.4	6.32	1.3	0.65	0.48	0.105	0.193	2.75	27.9	0.0015	1.44					Zn	-0.0143892	-0.236139	-0.93759	0.00784852	-0.00480078	0.0558927	1
37L-196-g-1''	25	Py12por		4.94	54.3	46.3	3.79	2.95	890	1340	145	1.9	100	3.48	2.84	1.82	1.01	0.165	0.213	4.65	17.8	0.0059	7.7					As	-0.0135438	-0.00865524	-0.120425	0.0820418	0.0812347	0.227545	-0.0573102	1
37L-196-g-1''	26	Py12por		5.53	16	46.2	4.92	3.05	1215	1310	68.8	2	78.5	8.26	3.4	1.22	1.05	0.105	0.152	2.01	45	0.0036	2					Se	0.14121	-0.137572	-0.121549	0.698445	0.691322	0.189631	0.0638612	-0.0333309	1
37L-196-g-1''	27	Py12por		4.88	13.4	46	3.56	1.03	1250	3640	152	7.1	88.8	4.4	10.8	4.46	1.25	0.105	0.189	4.08	31.2	0.0065	29.3					Mo	0.51233	-0.129769	-0.344345	0.0691705	-0.0363321	0.327156	0.228059	0.174165	0.0135126	1
37L-196-g-1''	28	Py12por		5.22	40.3	44.9	16.4	1.23	1570	13500	402	3.8	130.5	7.41	29.1	12.5	2	0.15	0.412	6.46	42.7	0.000425	1.97					Ag	0.0463624	-0.104064	-0.268457	0.083914	0.0618438	0.645143	0.0585601	0.50856	0.029612	0.119759	1
37L-196-g-1''	30	Py12por		3.74	19.7	46.1	3.27	1.98	1436	2900	78.7	0.25	60.3	12.08	10.9	2.14	1.11	0.105	0.244	2.09	58.7	0.011	10.7					Cd	0.0170034	-0.262926	-0.905274	-0.00231103	-0.0384774	0.141294	0.937778	-0.040641	0.0358623	0.237828	0.130594	1
37L-196-g-1''	31	Py12por		3	56.4	46.3	1.08	1.66	740	840	61.5	1.6	42.6	3.22	2.37	1.08	0.68	0.305	0.083	3.15	14.6	0.0008	4.47					Sn	-0.00990382	-0.0912935	-0.376808	-0.0166698	-0.0220634	0.237379	0.321192	0.0689963	-0.0341684	0.25189	0.0691384	0.287417	1
37L-196-g-1''	32	Py12por		3.95	20	46.1	0.99	1.01	668	2840	110	3.6	58.1	7.54	7.2	1.35	0.544	0.155	0.292	3.47	39.7	0.0011	5.17					Sb	0.342369	-0.252144	-0.399871	0.380669	0.277105	0.569573	0.177239	0.665732	0.250737	0.534154	0.56461	0.217577	0.308291	1
37L-196-g-1''	42	Py12por		3.25	208	46.3	6.17	1.32	990	60.3	330	4.5	64.1	11.95	0.033	2	1.37	0.105	0.7	1.06	103.2	0.005	0.525					Te	-0.0208243	-0.0319192	0.0840278	0.171904	0.195992	0.130183	-0.12009	-0.0991583	0.330829	0.0765171	-0.160815	-0.11509	0.280621	-0.00933749	1
37L-196-g-2''	44	Py12por		3.95	102.3	46.1	5.41	1.59	2530	700	629	2.6	107.5	10.3	0.69	3.21	1.82	0.105	0.83	1.5	88.5	0.001	8.1					Au	0.0609869	0.0167423	-0.146477	0.107047	0.0889624	0.414944	-0.0709532	0.808209	0.1727	0.119667	0.49177	-0.0257361	0.0214088	0.6676	0.0538091	1
37L-196-g-2''	46	Py12por		3.62	131.9	46.2	5.77	2.77	1260	136	1286	4.1	144.9	11.73	0.57	3.11	3.37	0.105	2.55	0.939	152.9	0.002	1.25					Tl	-0.187491	0.048853	0.146458	-0.11842	-0.0948792	-0.476508	-0.000473637	-0.18791	-0.144481	-0.129473	-0.4989	-0.0394409	-0.0681058	-0.347009	-0.0286197	-0.262233	1
37L-196-g-2''	47	Py12por		3.65	67.3	46	10.32	4.01	1720	334	2398	2.1	101.6	19.5	1.3	4.36	3.82	0.105	3.72	1.046	138.1	0.0033	1.38					Pb	0.106345	-0.0268519	-0.212437	0.0653706	0.049475	0.694955	-0.0346843	0.52837	0.095599	0.277622	0.816821	0.0125076	0.0346655	0.664992	-0.0207694	0.57929	-0.53866	1
37L-196-g-2''	50	Py12por		4.65	213	46.2	34.2	1.93	1040	1070	326	0.5	90	23.2	3.8	4.87	1.95	0.105	0.72	4.8	82.9	0.00225	9					Bi	0.0545621	0.148463	-0.0242678	0.495253	0.625	0.12998	-0.0442057	-0.0517566	0.629705	-0.0300133	-0.0488461	-0.072697	-0.0399898	0.0302178	0.621873	0.0583865	-0.0569252	0.0501191	1
37L-196-g-2''	52	Py12por		10.86	92.5	46	23.7	3.51	3430	1404	407	3.7	74.7	19.42	3.31	5.44	2.76	0.18	0.81	1.59	113.2	0.0026	11.73					U	0.548009	-0.181869	-0.157777	0.141128	0.157978	0.0562075	0.167561	-0.080599	0.0412612	0.290349	0.0406919	0.175935	0.0235547	0.0881785	-0.0773019	-0.0546715	-0.0670545	-0.0650471	0.0870113	1
37L-196-g-2''	55	Py12por		3.51	55	46.3	5.61	3.15	713	79	1300	1.8	73.4	13.7	0.26	2.99	1.84	0.105	0.698	0.82	81.5	0.013	1.13
37L-196-g-2''	56	Py12por		4.51	218	46.2	4.32	2.18	1650	94	690	1.2	119	15.55	0.28	3.7	2.43	0.105	0.6	1.69	133	0.006	1.1
37L-196-g-2''	60	Py12por		6.7	422	46.1	8.5	2.21	2820	351	347	1	181.4	13.33	1.74	5.7	2.19	0.105	0.277	1.69	141.2	0.0065	2.96
37L-196-g-2''	61	Py12por		3.27	83.7	46.2	5.66	1.2	1950	345	378	2.4	58.3	13.39	1.54	3.82	1.15	0.105	0.385	1.13	113.4	0.00425	1.32
37L-196-g-2''	62	Py12por		2.72	60.1	46.4	4.05	2.68	802	77	219	1	42.6	11.64	0.039	2.24	0.98	0.105	0.136	0.847	92.8	0.009	0.471
37L-196-g-2''	63	Py12por		6.2	18.2	46.2	12.1	5.55	2480	229	249	0.31	64.9	16.6	0.91	3.25	1.29	0.105	0.292	0.92	111	0.00445	4.36
37L-196-g-2''	64	Py12por		2.97	54	46.3	7.19	2.54	1970	295	91.5	4	48.9	17.9	0.69	3.63	0.74	0.105	0.116	1.29	107.4	0.0042	1.74
37L-196-g-2''	65	Py12por		6	444	46.2	9.25	2.09	1410	415	355	2.6	87.5	15.2	1	4.26	1.08	0.105	0.67	0.749	94.5	0.0013	1.49
37L-196-g-2''	66	Py12por		4.28	216	46.2	12.6	2.26	1430	1230	183	0.9	66	11.03	4.37	4.45	0.99	0.105	0.274	1.4	74.1	0.0065	0.716
37L-196-g-3''	1	PyPy12por		8.66	7.49	46.3	12.66	0.86	1007	435	105.3	4.1	107.1	2.68	1.17	1.69	1.3	0.24	0.157	2.26	47.5	0.055	3.08
37L-196-g-3''	2	PyPy12por		12.38	2.16	46.3	36.8	1.41	917	382	94	8.5	119.6	5.14	0.89	1.04	1.15	0.13	0.167	0.97	49	0.0195	2.41
37L-196-g-3''	3	PyPy12por		13.13	10.8	46.3	25	1.95	983	442	160	10.9	127.1	5.31	2.03	1.86	1.91	0.06	0.442	1.89	52.8	0.004	6.25
37L-196-g-3''	4	PyPy12por		12.04	1.73	46.3	31.9	1.27	1401	445	122	3.9	171	5.31	1.84	1.51	1.52	0.25	0.234	1.18	55.9	0.0315	8.8
37L-196-g-3''	5	PyPy12por		12.21	5.05	46.2	20.6	1.76	1650	715	124.4	3.8	167.8	3.2	1.6	1.15	1.42	0.24	0.107	2.56	29.3	0.062	4.2
37L-196-g-3''	6	PyPy12por		5.99	24.7	46.4	6.15	0.99	409	164	252	1.1	169.7	0.68	0.46	0.67	0.98	0.31	0.123	7.28	15.1	0.022	2.1
37L-196-g-3''	9	PyPy12por		16.2	25.3	46.1	51.8	2.24	2550	861	357	11.4	137.4	6.19	4.2	2.39	2.51	0.25	1.41	3.67	99.7	0.027	5.11
37L-196-g-3''	10	PyPy12por		11.1	16.3	46.2	39.2	1.66	1600	550	205	5.7	117.6	2.21	3.1	1.16	1.77	0.18	0.324	3.89	37.7	0.006	4.95
37L-196-g-3''	11	PyPy12por		14.6	7.9	46.2	50.8	2.59	1860	1020	224	4.5	132.2	4	3.9	1.23	1.76	0.63	1.12	2.05	57	0.008	7.02
37L-196-g-3''	6	Py12por		0.31	359	46.2	2.43	12.9	1540	393	5.4	14	84.4	3.02	0.68	0.88	0.21	1.06	0.37	3.71	74.7	1.81	1.17
37L-196-g-3''	7	Py12por		0.23	866	46	2.39	18.9	3250	77	3.8	8.4	22.6	1.86	0.67	1.11	0.26	0.1	0.82	5.3	31.5	0.26	1.6
37L-196-g-3''	13	Py12por		0.04	19	46.5	2.23	0.18	223.8	1.2	1.28	16.9	6.9	2.71	0.2	0.59	0.12	0.55	1.11	5.58	12.5	0.289	3.08
				V	Mn	Fe%	Co	Ni	Cu	Zn	As	Se	Mo	Ag	Cd	Sn	Sb	Te	Au	Tl	Pb	Bi	U
37L-196-g-1''	4	Py2.		2.22	58.5	46.5	2.31	0.7	49.3	76.2	33.6	0.55	46.3	0.139	0.15	0.33	0.112	0.105	0.037	29.9	0.443	0.0069	3.79
37L-196-g-1''	7	Py2.		3.53	40	46.5	9.72	2.77	128	144	84.8	2.3	42	0.412	0.3	0.17	1.01	0.105	0.034	4.3	6.65	0.0029	2.94
37L-196-g-1''	11	Py2.		2.68	34.9	46.4	3.88	1.63	18.7	550	81.2	1.2	53.4	0.171	0.76	0.41	0.66	0.105	0.034	6.24	1.26	0.0015	1.079
37L-196-g-1''	13	Py2.		2.23	156	46.5	1.33	1.13	7.9	96.1	22.6	0.17	33.4	0.02	0.16	0.126	0.207	0.105	0.005	3.61	0.44	0.0027	1.05
37L-196-g-1''	17	Py2.		2.9	159.6	46.4	5.28	1.86	129	423	31.2	0.33	43	0.221	1.27	0.25	0.409	0.12	0.028	5.23	1.59	0.0026	3.31
37L-196-g-1''	35	Py2.		3.69	379	46.4	0.7	0.52	213	127.7	216	0.9	81.7	1.78	0.136	0.35	0.342	0.12	0.068	4.08	16.4	0.0083	0.571
37L-196-g-1''	36	Py2.		2.87	181	46.4	0.427	0.5	96	124	162.2	0.36	67.3	0.63	0.055	0.114	0.379	0.105	0.054	6.4	10.8	0.0034	2.15
37L-196-g-1''	38	Py2.		3.29	146	46.4	5.81	2.86	193	175	820	0.39	85.4	1.41	0.5	0.32	1.37	0.105	0.66	13.89	21.7	0.0158	1.31
37L-196-g-1''	39	Py2.		2.56	386	46.4	0.773	1.15	47.3	196	235	0.5	82.2	0.163	0.17	0.127	0.389	0.105	0.018	5.76	5.47	0.0047	1.31
37L-196-g-1''	40	Py2.		3.29	59	46.4	1.56	0.33	45.1	1230	141.3	3.9	35.4	0.468	1.11	0.79	0.65	0.105	0.03	7.13	2.35	0.0112	0.59
37L-196-g-1''	41	Py2.		2.24	258	46.4	0.72	0.71	11	205	233.5	1	81.5	0.046	0.69	0.38	0.478	0.105	0.053	12.79	3.67	0.0055	0.158
37L-196-g-2''	43	Py2.		2.92	449	46.4	0.473	0.51	4.97	168	205.4	0.39	93.4	0.056	0.26	0.096	0.324	0.305	0.047	11.95	2.76	0.002	0.302
37L-196-g-2''	45	Py2.		3.2	405	46.4	1.47	0.35	35.5	196	229	0.16	76.9	0.38	0.47	0.92	0.33	0.105	0.254	7.75	8	0.0005	0.609
37L-196-g-2''	48	Py2.		2.83	138.5	46.4	5.54	0.65	208	268	194	7.9	45.1	2.18	1.27	1.31	0.57	0.05	0.202	4.57	14.8	0.008	0.736
37L-196-g-2''	51	Py2.		2.46	96	46.5	8.17	0.96	184	118	114	5.8	38.2	1.84	0.35	0.53	0.206	0.105	0.039	3.41	10.2	0.0003	0.606
37L-196-g-2''	53	Py2.		3.04	48.2	46.5	0.532	0.122	5.91	29.6	148.2	1.2	34.8	0.054	0.014	0.036	0.47	0.195	0.051	13.69	0.341	0.001	0.125
37L-196-g-2''	54	Py2.		2.74	373	46.4	0.51	0.28	50.1	61.8	182.7	0.9	65.7	0.31	0.055	0.162	0.254	0.105	0.009	4.25	5.1	0.0073	0.88
37L-196-g-2''	58	Py2.		2.78	442	46.4	0.465	0.64	128	152	189	0.38	85.8	0.64	0.046	0.2	0.24	0.105	0.033	4.81	4.1	0.0014	0.34
37L-196-g-2''	59	Py2.		4.07	440	46.4	0.74	0.41	89	78.9	185	0.75	73.8	0.09	0.041	0.3	0.413	0.105	0.025	3.89	5.8	0.0018	0.8
37L-196-g-2''	67	Py2.		3.3	128	46.5	1.75	0.69	162	19	117.9	1.4	26.1	0.107	0.06	0.095	0.221	0.105	0.022	3.18	69	0.0007	0.352
37L-196-g-2''	68	Py2.		3.55	16.6	46.5	3.24	0.43	40	36.6	105	1.2	14	0.244	0.061	0.168	0.309	0.255	0.017	8.84	2.92	0.003	0.236
37L-196-g-3''	12	Py2.		4.64	90.2	46.4	1.6	1.68	443	346	192.4	2.3	110.3	0.16	1.61	0.37	0.98	0.375	0.092	4.46	72	0.021	3.33
37L-196-g-3''	13	Py2.		2.16	79.9	46.5	0.9	0.45	112	63	139.2	1	56.5	0.038	0.19	0.26	0.58	0.4	0.037	5.74	10.7	0.023	0.94
37L-196-g-3''	14	Py2.		5.54	143.9	46.4	2.48	1.99	52	276	131.2	0.7	91.2	0.078	0.58	0.26	1.27	0.044	0.028	7.27	52	0.002	0.78
37L-196-g-3''	15	Py2.		2.38	90.7	46.4	1.07	0.86	151	86	218	2.15	109.6	0.023	0.14	0.22	0.88	0.12	0.062	9.19	9.9	0.03	0.69
37L-196-g-3''	7	Py2.		5.18	92.7	46.4	8.34	0.99	349	131	185	7.4	103.9	0.55	0.39	1.97	0.7	0.255	0.065	8.58	19.2	0.02	1.45
37L-196-g-3''	12	Py2.		4.64	90.2	46.4	1.6	1.68	443	346	192.4	2.3	110.3	0.16	1.61	0.37	0.98	0.375	0.092	4.46	72	0.021	3.33
37L-196-g-3''	13	Py2.		2.16	79.9	46.5	0.9	0.45	112	63	139.2	1	56.5	0.038	0.19	0.26	0.58	0.4	0.037	5.74	10.7	0.023	0.94
37L-196-g-3''	14	Py2.		5.54	143.9	46.4	2.48	1.99	52	276	131.2	0.7	91.2	0.078	0.58	0.26	1.27	0.044	0.028	7.27	52	0.002	0.78
37L-196-g-3''	15	Py2.		2.38	90.7	46.4	1.07	0.86	151	86	218	2.15	109.6	0.023	0.14	0.22	0.88	0.12	0.062	9.19	9.9	0.03	0.69
With Cp andSph				V	Mn	Fe%	Co	Ni	Cu	Zn	As	Se	Mo	Ag	Cd	Sn	Sb	Te	Au	Tl	Pb	Bi	U
37L-196-g-1''	8	Py2.		5.85	18.1	45.3	12.45	3.8	1250	10500	193	5.1	165	7.57	13.2	11	1.62	0.13	0.167	3.08	61.6	0.0137	15
37L-196-g-1''	9	Py2.		3.53	38.1	45.6	5.12	0.9	707	7540	316	3.9	141.3	5.78	12.2	7.55	1.53	0.105	0.241	9.82	39.7	0.0079	4.83
37L-196-g-1''	15	Py2.		4.16	11.76	46.3	6.93	2.8	1094	865	132.1	7.3	116.2	8.77	1.34	1.12	1.13	0.105	0.2	4.03	68.8	0.0052	5.16
37L-196-g-1''	1	Py2.		3.9	57.4	46.2	317	79.2	1570	571	480	21.5	65.8	5.98	0.74	1.7	2.42	0.425	0.501	3.9	39.3	0.909	7.81
37L-196-g-1''	2	Py2.		42.2	75.7	46.3	107.6	29.7	810	532	235	8.5	183	2.67	0.55	1.32	1.73	0.105	0.161	4.3	16.9	0.495	93
37L-196-g-1''	3	Py2.		2.34	60.7	46.4	34.1	8.4	420	217	245	2.9	46.1	1.38	0.28	0.4	0.94	0.105	0.19	11.33	7.35	0.033	1.69
37L-196-g-1''	5	Py2.		4.51	78.3	46.3	25.4	4.56	610	1010	77.1	7.9	106.5	2.83	1.19	0.72	0.98	0.105	0.084	8.62	22.1	0.008	3.13
37L-196-g-1''	6	Py2.		2.56	17.56	46	185.1	45.9	612	3570	350	31.1	56.1	8.3	5.32	3.25	2.49	0.25	0.482	2.71	63.4	0.712	0.93
37L-196-g-1''	12	Py2.		3.35	7.8	46.3	46.9	11.62	900	1350	38.5	4.5	42	3.26	2.63	1.91	0.307	0.105	0.144	1.93	20.7	0.0013	0.988
37L-196-g-1''	33	Py2.		2.78	35.5	45.9	2.13	1.98	224	5200	119	1.14	77.8	2.78	9.7	2.74	0.98	0.105	0.064	4.28	12.5	0.0035	8.74
37L-196-g-1''	34	Py2.		4.64	15	46.2	1.08	1.18	674	1860	94.6	0.71	99	7.15	3.52	1.47	0.75	0.145	0.167	4.62	32.6	0.0003	96
37L-196-g-1''	10	Py2.		2.96	48.1	45	5.23	1.35	250	14900	82.1	3	56.9	1.07	18	18.5	1.02	0.105	0.037	5.04	8.6	0.002	9
37L-196-g-1''	14	Py2.		4.59	35.5	46.4	6.9	2.01	763	497	151.7	3.3	145.1	3.34	1.19	0.57	0.86	0.105	0.111	3.74	23.1	0.0037	29.9
37L-196-g-2''	49	Py2.		3.78	69.2	46.4	6.2	0.9	449	171	580	2.9	52.4	11	0.43	1.63	1.13	0.16	0.54	3.43	47.7	0.0024	1.6
37L-196-g-3''	7	Py2.		5.18	92.7	46.4	8.34	0.99	349	131	185	7.4	103.9	0.55	0.39	1.97	0.7	0.255	0.065	8.58	19.2	0.02	1.45
37L-196-g-3''	16	Py2.		6.71	66.7	46.2	21.5	2.04	1400	1250	135	2.4	161	6.15	4.1	4.95	1.38	0.17	0.217	3.78	49.6	0.041	5.12
37L-196-g-3''	8	Py2.		5.85	18.1	45.3	12.45	3.8	1250	10500	193	5.1	165	7.57	13.2	11	1.62	0.13	0.167	3.08	61.6	0.0137	15
37L-196-g-3''	9	Py2.		3.53	38.1	45.6	5.12	0.9	707	7540	316	3.9	141.3	5.78	12.2	7.55	1.53	0.105	0.241	9.82	39.7	0.0079	4.83
37L-196-g-3''	8	Py2.		3.7	63	46.2	3.54	1.68	1710	600	272	1.3	146.3	0.67	1.29	67.9	2.22	0.7	0.125	5.07	9.8	0.0205	4.25
37L-196-g-3''	15	Py2.		4.16	11.76	46.3	6.93	2.8	1094	865	132.1	7.3	116.2	8.77	1.34	1.12	1.13	0.105	0.2	4.03	68.8	0.0052	5.16
37L-196-g-3''	16	Py2.		6.71	66.7	46.2	21.5	2.04	1400	1250	135	2.4	161	6.15	4.1	4.95	1.38	0.17	0.217	3.78	49.6	0.041	5.12

## Sheet: Table 4
Table 4. Trace element concentration in pyrrhotite and varieties of pyrite of microfacies-195. Pobeda vent site. (samples 37L-195-1, 37L-195-2, and 37L-195-3).
	Type	V	Mn	Fe%	Co	Ni	Cu	Zn	As	Se	Mo	Ag	Cd	Sn	Sb	Te	Au	Tl	Pb	Bi	U			V	Mn	Fe	Co	Ni	Cu	Zn%	As	Se	Mo	Ag	Cd	Sn	Sb	Te	Au	Tl	Pb	Bi	U
37/247.2''	Po	1.37	34.4	63.5	0.12	9.1	631	33	2.1	4.8	0.15	0.64	0.12	0.9	0.026	0.165	0.24	0.049	5.7	0.61	0.2		V	1
37/247.2''	Po	0.61	49.7	62.4	0.37	6.7	2110	275	1.8	6.9	1.2	5.2	0.12	4.1	0.026	0.165	0.26	0.33	15.4	0.17	0.027		Mn	-0.102079	1
37/247.2''	Po	2.7	43	63	0.14	6.7	760	1460	17	2.2	37	5.7	2.8	5	1.3	0.165	0.18	0.54	193	0.17	6.9		Fe	0.0112307	-0.482216	1					Po
37/247.2''	Po	1.45	56	63.5	0.61	8.9	1269	125	2.3	15	0.29	6	0.12	7.4	0.7	8	0.6	0.32	29	0.6	0.15		Co	0.14002	-0.119081	0.337096	1
37/247.2''	Po	2.4	42	62.8	0.61	2.3	326	27	3.5	1.8	0.15	4	0.12	1.7	0.026	0.165	0.6	0.265	35.6	0.65	0.017		Ni	-0.188283	0.407508	-0.142089	0.134961	1
37/247.2''	Po	0.94	69	62.5	0.2	9.3	1650	7000	4.9	3.8	16	11.7	10.3	12.2	0.026	0.165	0.09	1.1	71.5	0.39	2.05		Cu	-0.570603	0.140888	0.0640629	0.0755061	0.128867	1
37/247.2''	Po	0.07	53.8	63.6	0.5	6.5	768	364	5	1.8	50.6	4.22	0.22	2.7	0.23	0.165	0.16	1.53	63.1	0.25	0.045		Zn%	-0.0175887	0.429098	-0.0744734	-0.121295	0.159722	0.196923	1
37/247.2''	Po	1.16	39.1	62.7	0.31	7.1	441	51	6	2.6	0.3	0.4	0.9	3.8	0.026	0.165	0.19	0.03	16.5	0.49	0.078		As	-0.0559655	0.545001	-0.89424	-0.267964	0.141864	-0.0291685	0.0324708	1
37/247.2''	Po	1.79	35.3	62.5	0.24	5.4	365	26	7.7	2.2	4.2	1.85	0.12	2	0.28	2.35	0.13	0.34	44.7	0.39	0.086		Se	0.0122133	0.22224	-0.0406864	0.26813	0.14579	0.142771	0.0229323	0.0727221	1
37/247.2''	Po	0.14	35.6	62.5	0.44	11.8	535	11	2.7	2.5	0.15	0.4	0.12	1.6	0.026	3.7	0.195	0.02	15.1	0.34	0.095		Mo	0.014927	0.294042	-0.291516	-0.0604923	0.00115375	-0.121376	0.249135	0.405533	-0.154649	1
37/247.2''	Po	1.14	37.4	62.8	0.25	5.9	703	351	2.4	0.5	4.6	2.68	0.67	1.79	0.034	0.165	0.25	0.18	11.4	0.18	0.091		Ag	-0.071165	0.785356	-0.231914	-0.145539	0.400917	0.191823	0.277257	0.282107	0.00598735	0.133701	1
37/247.2''	Po	0.2	40.6	63	0.38	6.4	3350	289	3.2	1.4	0.15	5.42	0.12	3.3	0.026	0.165	0.058	0.03	11.3	0.23	0.055		Cd	0.0911936	0.326817	-0.0192202	-0.0638052	0.125676	0.10222	0.956695	-0.0493935	-0.0169858	0.223318	0.163324	1
37/247.2''	Po	0.021	35.6	63.1	0.2	5	2100	62	5	0.4	0.15	5.15	0.12	1.84	0.15	0.165	0.12	0.03	45.3	0.45	0.028		Sn	-0.0797065	0.660619	-0.369816	0.0558774	0.33762	0.306861	0.747979	0.427193	0.327959	0.340561	0.359175	0.693863	1
37/247.2''	Po	2.13	39.1	63.4	0.23	7.1	610	10.5	1.01	1	0.15	2.09	0.12	0.81	0.026	0.165	0.14	0.03	15.6	0.057	0.0385		Sb	0.249876	0.219218	-0.258237	-0.0163006	0.00168502	-0.111464	0.00425139	0.433965	0.199398	0.563645	0.0955991	0.0556752	0.317418	1
37/247.2''	Po	0.98	50.8	62.7	0.26	4.8	514	42	21.6	5.3	2.5	5.73	0.12	1.2	0.71	0.165	0.24	4.34	246	0.29	0.014		Te	0.101522	0.127745	-0.0954193	0.148135	0.233671	-0.106781	-0.134573	0.0362628	0.636919	-0.127864	-0.00449044	-0.134364	0.173716	0.199405	1
37/247.2''	Po	0.43	35.3	63.3	0.045	4.8	905	14.5	2.7	1.6	0.08	1.88	0.12	1.28	0.13	0.165	0.16	0.14	15.4	0.29	0.015		Au	0.279447	0.0179671	-0.0146826	0.35545	-0.0903703	-0.25328	-0.173413	-0.00857728	0.543993	-0.180241	-0.161701	-0.182423	0.00607628	0.0591281	0.38063	1
37/247.2''	Po	0.86	76.1	62.4	0.15	13	1178	362	15.8	0.8	5.1	30.3	0.12	3.2	0.11	0.165	0.13	2.76	262	0.19	0.034		Tl	-0.0989306	0.707103	-0.425721	-0.185641	0.150624	-0.104448	0.106023	0.560004	0.0526527	0.30882	0.610493	0.0344095	0.239253	0.416895	-0.0527493	-0.105559	1
37/247.2''	Po	2.12	37.6	62.2	0.13	7.3	655	215	3.7	3.8	1.19	2.47	0.12	1.38	0.026	3.45	0.275	0.03	18.8	0.33	0.17		Pb	0.109324	0.329834	-0.397641	-0.21629	0.124585	-0.153865	0.0718753	0.388331	-0.116601	0.544884	0.440654	0.0230994	0.140022	0.558281	-0.0845447	-0.118328	0.574956	1
37/247.2''	Po	1.19	44.1	63	0.31	4.4	1249	1010	7.2	1.7	11.1	4.13	0.9	3.9	0.09	0.75	0.13	0.013	35.4	0.049	0.91		Bi	0.1484	-0.141492	0.0961877	0.151692	-0.138866	-0.186439	-0.00411627	-0.116726	0.208174	-0.131745	-0.189779	0.0930875	0.0453903	0.069605	0.270084	0.372479	-0.110608	-0.0650286	1
37/247.2''	Po	1.86	53.3	63.2	0.11	6.3	800	720	7.1	1	2.7	9.4	0.12	2.4	0.026	0.165	0.17	1.41	102	0.22	0.6		U	0.439985	-0.0173225	-0.091827	0.0191509	0.0499563	-0.102088	0.313466	0.122679	-0.148839	0.607967	0.0253008	0.377478	0.304201	0.676961	-0.145455	-0.140619	-0.00745437	0.553664	-0.0480296	1
37/247.2''	Po	1.53	51.1	62.8	0.19	6.6	682	673	9.1	5.3	7.4	15.1	0.12	2.7	0.026	3.2	0.066	1.41	121.9	0.13	0.08
37/247.2''	Po	0.69	35.5	63.2	0.58	8.2	1970	288	4.2	8.6	0.15	3.52	0.12	3.02	0.026	0.165	0.21	0.02	15.3	0.15	0.07
37/247.2''	Po	0.29	41.2	63	0.17	9.7	1404	601	0.51	0.5	3.8	4.62	0.64	3	0.026	0.165	0.12	0.35	42.6	0.11	0.34
37/247.2''	Po	0.45	45.9	63.6	0.5	10.8	1297	1190	5.4	3.9	3.5	7.7	0.12	4.7	0.026	0.165	0.445	0.6	54.7	0.12	0.08
37/247.2''	Po	0.21	46.2	63	0.19	6.7	1960	920	2.4	5.5	0.83	5.32	0.12	2.76	0.026	0.165	0.215	0.055	18.9	0.12	0.015
37/247.2''	Po	2.79	41.8	63	0.93	10	529	204	4.8	2.2	8.8	4.3	1.1	3.2	0.29	0.165	0.225	0.24	91	0.17	3.2
37/247.2''	Po	1.08	33.3	62.1	0.22	6.7	940	608	21.9	0.65	36.1	4.19	0.25	3.4	0.6	0.165	0.115	0.58	453	0.39	4.63
37/247.2''	Po	1.18	46.6	61.8	0.09	8	672	59	5.5	5	7.7	1.37	0.12	1.43	0.026	2.45	0.42	0.04	157	0.094	0.3
37/247.2''	Po	1.2	40.7	62.8	0.2	7.9	645	78	5.4	0.8	0.15	0.05	0.12	3.2	0.026	0.165	0.11	0.03	20.5	0.24	0.053
37/247.2''	Po	0.78	78	58.2	0.031	9.4	1084	780	164	5	30.7	12.3	0.12	8.9	0.72	1.55	0.245	3.24	203	0.17	0.9
37/247.2''	Po	0.53	40.4	63	0.18	4.6	841	131	14.2	1.6	8.8	4.56	0.19	2.73	0.2	0.165	0.145	0.69	42.7	0.1	0.009
37/247.2''	Po	0.29	55.4	63	0.42	11.7	2020	302	16.6	2.2	8.8	8.6	0.37	5.1	0.47	2.25	0.017	1.45	93.9	0.21	0.7
		V	Mn	Fe, %	Co	Ni	Cu	Zn	As	Se	Mo	Ag	Cd	Sn	Sb	Te	Au	Tl	Pb	Bi	U			V	Mn	Fe, %	Co	Ni	Cu	Zn	As	Se	Mo	Ag	Cd	Sn	Sb	Te	Au	Tl	Pb	Bi	U
37L-195-1''	Py1fr	39.5	2210	45.8	5.18	22.4	2980	858	65.9	2.4	403	2.8	1	5.68	5.6	1.35	1.82	133.9	20.5	0.13	33.1		V	1
37L-195-1''	Py1fr	30.9	940	45.9	4.2	31	3890	829	57	100	216	4	3.15	6.7	2.3	23.5	1.2	30.1	5.5	0.5	29.8		Mn	-0.400236	1
37L-195-1''	Py1fr	25.3	3070	46	0.49	10.7	930	291	23.4	8	100	1.79	0.9	2.1	0.9	7	1.68	164	3.6	0.05	11.1		Fe, %	0.18788	-0.0808417	1
37L-195-1''	Py1fr	29.6	908	46.2	1.06	13.4	1649	286	40.5	9.5	124.5	2.65	0.85	4.5	2.08	3.65	1.97	102.2	4.8	0.003	25		Co	0.167328	-0.0933741	-0.374733	1
37L-195-1''	Py1fr	33.7	1430	45.8	1.38	20.2	3990	841	45.6	12.5	196.7	3.6	1.4	9.9	2.66	1.3	2.19	120	9.8	0.11	45.3		Ni	0.219928	-0.367237	-0.238493	0.743027	1							Py1f
37L-195-1''	Py1fr	21.1	1535	46.1	0.61	10.9	1609	433	27.7	10	98.4	2.74	0.24	4.3	1.85	3.1	1.73	141.2	5.6	0.006	27.2		Cu	-0.0820194	-0.248077	-0.934873	0.352577	0.34563	1
37L-195-1''	Py1fr	27.3	1260	45.9	1.61	12.2	2770	941	53.9	7.5	386	3.23	0.9	18.6	3	1.7	1.31	75.9	12	0.09	38.7		Zn	0.113412	-0.314356	-0.460773	0.478428	0.422893	0.478184	1
37L-195-1''	Py1fr	15.1	7460	45.4	1.65	12.6	3300	413	9.7	11	59.7	0.74	0.35	2.97	0.57	4.3	0.69	116.4	29.8	0.068	25.4		As	0.555299	-0.427636	0.135134	0.360019	0.273525	-0.0296833	0.318674	1
37L-195-1''	Py1fr	26.7	749	46	1.41	17.5	2660	834	23.8	1	186	3.17	0.85	5.4	2.5	3.15	1.03	38.8	7.1	0.11	41		Se	0.157505	-0.113252	-0.00197763	0.329395	0.334242	0.0301613	0.291538	0.253749	1
37L-195-1''	Py1fr	23.5	479	45.4	2.77	26	8700	1664	40.9	32	285	1.86	1.65	6.1	4	4.1	0.9	24.4	16.7	0.39	94.3		Mo	0.324811	-0.261529	-0.0394324	0.286609	0.211145	0.0423305	0.446864	0.666363	0.00471811	1
37L-195-1''	Py1fr	29.5	963	45.7	2.32	24.5	5290	892	51.9	10.5	726	3.8	0.17	7.2	4.3	1.3	1.76	44.9	20.5	0.43	43		Ag	-0.292823	-0.0781688	0.264672	0.108948	-0.0686964	-0.249135	0.118333	0.295798	0.163339	0.241555	1
37L-195-1''	Py1fr	10.7	2510	45.9	3.22	20.1	2560	763	23.1	18	135.3	7.7	0.37	6	2.7	4.8	0.3	7.8	33.9	0.054	20.8		Cd	0.309701	-0.22086	-0.302214	0.377616	0.246667	0.318395	0.474943	0.296788	0.769961	0.0183617	0.00305643	1
37L-195-1''	Py1fr	23.8	693	44.7	2.61	22.4	16600	785	31.3	5	135	1.11	0.95	6.8	1.86	4.3	0.9	54.5	7.9	0.2	38.2		Sn	0.127902	-0.313177	0.0568136	0.00443903	0.020839	-0.00266409	0.223163	0.490478	-0.0376693	0.413092	0.219319	0.0455821	1
37L-195-1''	Py1fr	24.5	699	44.9	2.99	22.4	13900	814	27.1	11	133.8	1.7	1.7	5.4	2.54	1.3	1.12	47.7	6.2	0.29	62.1		Sb	0.368932	-0.357903	-0.112799	0.531608	0.250235	0.141444	0.63826	0.669952	0.0134005	0.754815	0.295546	0.185809	0.238358
37L-195-1''	Py1fr	32.8	1071	46.1	1.44	18.5	1980	654	17.2	17	111	0.42	0.95	3.8	1.78	15.5	0.42	19.1	7	0.23	28.3		Te	0.0835203	-0.0666052	0.125183	0.125754	0.126654	-0.101599	0.0481254	0.00555583	0.7784	-0.140731	-0.00819033	0.616201	-0.184719	-0.135594	1
37L-195-1''	Py1fr	24.4	1024	46	3.37	32.1	3470	537	28.8	4.35	126	1.49	0.09	6.4	1.71	1.5	1.44	91	7.7	0.052	27		Au	0.387261	-0.256332	0.255504	-0.0985509	0.0347617	-0.182604	-0.144255	0.563108	-0.155733	0.325514	-0.00751412	-0.0430999	0.129494	0.292917	-0.178347	1
37L-195-1''	Py1fr	36.5	1073	46.2	1	18.6	1520	337	37.9	21	133.7	1.28	0.35	6.9	1.72	1.55	1.21	96.7	4.8	0.001	9.18		Tl	0.0498696	0.323776	0.303428	-0.397896	-0.493823	-0.38517	-0.566699	0.0894079	-0.386971	-0.147708	-0.175761	-0.330969	-0.0982536	-0.135575	-0.251685	0.642208	1
37L-195-1''	Py1fr	24.5	977	46.1	1.18	20	2207	321	36.3	7	190.8	2.8	0.375	10.9	1.31	2.75	0.95	63.7	7.9	0.074	9.79		Pb	-0.404903	0.537866	-0.220825	0.330872	0.0294761	-0.00241229	0.319877	-0.0517737	-0.035153	0.2824	0.409382	-0.171768	-0.0269436	0.318701	-0.134614	-0.313159	-0.228578	1
37L-195-1''	Py1fr	26	1121	45.8	4.06	40.5	4700	614	40	3	212	1.67	0.37	7.1	2.3	1.3	1.66	68.9	6.9	0.005	34.8		Bi	0.124397	-0.222772	-0.347912	0.299789	0.22166	0.392517	0.545623	0.309914	0.558362	0.428752	0.116823	0.563764	-0.0270013	0.351872	0.405714	-0.195886	-0.45208	0.0337836	1
37/195.3''	Py1fr	22.5	2850	45.9	1.63	6.7	2220	332	30	1.2	174	3.2	0.7	6.9	1.9	0.0405	0.67	105	6.6	0.27	24.1		U	0.0325835	-0.283381	-0.571741	0.319183	0.317934	0.597599	0.877597	0.148742	0.123469	0.285058	-0.0931764	0.40923	0.0662788	0.501995	-0.121385	-0.0548373	-0.413823	0.128648	0.525452	1
37/195.3''	Py1fr	24.7	1560	46.1	0.94	17	2990	554	50	5.5	154	4.3	0.12	5.4	1.8	0.9	1.43	107	8.7	0.27	30.1
37/195.3''	Py1fr	20.1	1295	46.1	0.87	10.6	2020	354	32.3	2	160	2.9	0.12	6.9	2.77	7.1	1.73	159	6.28	0.15	25
37/195.3''	Py1fr	23	855	46	1.43	16.4	2820	538	52.1	6.5	322	2.96	0.9	8.8	2.9	7.7	2.19	137	11.6	0.11	21.1
		V	Mn	Fe, %	Co	Ni	Cu	Zn	As	Se	Mo	Ag	Cd	Sn	Sb	Te	Au	Tl	Pb	Bi	U
37L-195-g-3''	12ap	3.57	3310	45.9	10.6	14.1	2590	49	10	6.7	96.4	7.6	0.38	2.9	0.76	0.48	0.63	16.1	56.4	0.13	10.8
37L-195-g-3''	12ap	16.2	4420	45.7	9.8	23.4	2800	282	18.2	2.4	435	7.8	1.2	2.6	0.65	0.165	2.1	16.1	67.1	0.083	9.2
37L-195-g-3''	12ap	7.1	3350	45.8	6.41	21.1	2880	204	13.1	5.1	69.7	7.3	0.12	3.1	2.19	0.165	0.56	31.6	53.8	0.09	24.1
37L-195-g-3''	12ap	2.35	2570	46.1	5.96	9.1	1460	27	5.3	3.5	28.8	3.7	0.12	0.9	0.16	0.75	0.38	16.4	33.7	0.15	3.7
37L-195-g-3''	12ap	2.26	3880	46	3.59	11.9	1280	100	5.7	2.1	43.1	3.4	0.12	1.39	0.93	0.165	0.16	7.9	33.5	0.22	2.6
37L-195-g-3''	12ap	3.5	1790	46.2	2.9	7.9	1490	102	6.4	4.8	36.7	2.98	0.12	1.26	1.03	0.7	0.3	14.4	5.2	0.15	3.33
37L-195-g-3''	12ap	5.3	2157	46.1	1.78	4.1	2210	740	7.1	2.7	32.4	1.63	0.12	2.6	0.55	0.165	0.58	38.3	21.6	0.14	11.5
37L-195-g-3''	12ap	7	980	46.1	6.6	43.1	2580	328	7.9	5.4	52	4.9	0.12	1.7	0.14	0.165	0.46	10.8	40.7	0.21	18.8
37L-195-g-3''	12ap	2.18	2180	46.1	4.17	30.6	1500	60	4.8	4.7	8.5	0.87	0.12	1.2	0.026	1.25	0.0015	2.06	2.9	0.34	5.4			Pyall
37L-195-g-3''	12ap	5.3	457	46.3	3.88	39	1450	139	5.6	9.5	23.1	2.58	0.12	1.8	0.94	0.85	0.17	4.6	17.8	0.15	5.96			V	Mn	Fe, %	Co	Ni	Cu	Zn	As	Se	Mo	Ag	Cd	Sn	Sb	Te	Au	Tl	Pb	Bi	U
37L-195-g-3''	12ap	9.8	537	46.2	0.66	10.2	1420	426	21.6	2.6	291	2.17	0.12	7.3	2.3	0.165	0.53	17.7	15.3	0.055	8.3		V	1
37L-195-g-3''	12ap	1.91	1660	46.3	2.22	14.2	630	87	30.4	3	19.6	5.1	0.12	1.32	15.3	1.8	0.18	2.85	15.8	0.09	4.9		Mn	-0.089174	1
37L-195-g-3''	12ap	4.9	2280	46.1	5.8	30.6	1170	147	13.7	3.25	118	9.6	0.12	2.4	2.4	0.165	0.058	3.99	104	0.19	8.6		Fe, %	-0.444014	-0.323438	1
37L-195-g-3''	12ap	2.67	1478	46.2	4.17	22.1	1320	133	4.7	1.13	22.1	1.76	0.12	2.06	0.57	0.165	0.26	3.23	18.1	0.028	6.4		Co	-0.119147	0.264267	-0.280992	1							Pyall
37L-195-g-3''	12ap	6.4	1620	46.1	3.98	24	1910	333	13.6	2.4	67.1	3.3	0.12	4.7	2.8	0.65	0.001	9.6	38.2	0.12	11.6		Ni	-0.0753958	-0.0376315	-0.138522	0.254316	1
37L-195-g-3''	12ap	1.71	161	46.3	5.3	29.6	1680	154	5.2	1.7	19.8	3.35	0.12	2.7	0.17	0.165	0.14	8.3	32.6	0.2	6.2		Cu	0.433716	-0.070662	-0.900654	0.190858	0.080806	1
37L-195-g-3''	12ap	1.95	1180	46.3	4.7	21.8	867	62	5.6	1.1	16.2	2.3	0.12	1.6	0.3	1.2	0.145	1.51	25.8	0.059	5.9		Zn	0.415497	-0.0502807	-0.536391	-0.0159353	0.574273	0.461663	1
37L-195-g-3''	12ap	6.5	1500	46.2	5	24.9	1200	193	10.5	3.9	136	3.55	0.12	4.3	1.13	0.65	0.21	7.2	61.9	0.11	10.8		As	0.31083	-0.0282836	-0.221978	-0.0736713	0.481249	0.141155	0.625739	1
37L-195-g-3''	12ap	2.36	1090	46.3	2.38	11.4	680	78	4.3	3	49.1	1.83	0.12	0.83	0.08	0.165	0.12	1.32	23.7	0.074	2.84		Se	0.387891	-0.0948755	-0.193517	0.051394	0.0956642	0.211912	0.303596	0.218734	1
37L-195-g-3''	12ap	12.2	1521	46	3.57	21	2010	424	13.8	1.2	580	4	0.12	5.6	1.94	0.165	0.057	5.8	62.6	0.15	19		Mo	0.565694	-0.0579002	-0.375369	0.158981	0.110908	0.311191	0.466209	0.343283	0.16427	1
37L-195-g-3''	12ap	4.9	2000	46.2	3	22.4	1180	125	10.9	3	227	5.2	0.12	3.7	1.85	0.165	0.18	9.8	46.2	0.05	11.2		Ag	-0.148785	0.262263	-0.180804	0.578981	0.440284	0.0173442	0.317321	0.49292	0.0396541	0.21783	1
37L-195-g-3''	12ap	2.49	1760	46.2	0.92	6	860	149	5.6	2	28.7	2.36	0.12	2.3	0.25	0.165	0.19	5.8	22.1	0.19	8.3		Cd	0.506862	0.0315996	-0.34977	-0.0237277	0.00121285	0.318691	0.326543	0.164101	0.587583	0.216496	-0.0863382	1
37L-195-g-3''	12ap	4.7	2710	45.7	10.3	33.3	4330	407	22.6	1.5	129	12.92	0.12	2.3	2.63	0.55	0.35	15.8	76.5	0.17	36.5		Sn	0.672653	-0.110572	-0.400596	-0.0650859	-0.0710939	0.403077	0.336588	0.268332	0.229572	0.563915	-0.0336113	0.304029	1
37L-195-g-3''	12ap	6.8	3080	45.9	7.6	16.8	2590	441	20.5	3.6	76.8	7.6	0.12	2.6	2.43	0.165	0.43	18.7	32.2	0.19	24.5		Sb	-0.0559542	0.00925642	0.0384384	-0.0825015	-0.0262407	-0.0420625	-0.00599635	0.474731	0.00627267	0.0221127	0.233926	-0.0370551	0.0334881	1
37L-195-g-3''	12ap	0.83	1332	46.3	2.25	29.9	880	10.6	24.2	0.37	9.3	4.35	0.12	1.09	5.8	0.165	0.033	0.83	6.4	0.12	1.76		Te	0.504151	-0.0786023	-0.178305	-0.0469522	-0.0203543	0.186955	0.219117	0.192069	0.798362	0.163473	-0.0630775	0.524378	0.264995	0.0542593	1
37L-195-g-3''	12ap	4.1	1170	46.2	3.5	23.8	1810	99	0.8	7.2	18.3	0.6	0.12	2.7	0.52	0.165	1.46	3.8	11.8	0.14	7.57		Au	0.727703	-0.0542802	-0.256397	-0.112176	-0.217045	0.256189	0.142176	0.116875	0.177869	0.385843	-0.213582	0.405619	0.492767	-0.0940213	0.256756	1
37L-195-g-2''	12ap	3.67	2172	46.1	1.93	72.7	1004	622	44	13.9	72.9	7.75	0.49	4.3	0.63	0.5	0.45	0.89	54.2	0.0052	6.48		Tl	0.26919	0.0602652	0.0382424	-0.417428	-0.380791	-0.0615491	-0.173503	-0.224095	-0.0579126	-0.127712	-0.478764	0.237021	0.135135	-0.161032	0.00261651	0.538697	1
37L-195-g-2''	12ap	7	2306	45.8	1.78	70.7	3160	1540	62.9	6.7	184	9.4	0.27	1.43	2.96	0.18	0.38	1.21	72.2	0.024	13.5		Pb	-0.295173	0.322375	-0.161528	0.610878	0.421426	-0.0108033	0.22442	0.220574	-0.0990162	0.207369	0.81631	-0.168341	-0.146177	0.0102973	-0.215289	-0.33754	-0.474676	1
37L-195-g-2''	12ap	5.73	2430	46	1.68	42.4	1670	1140	65.2	2.7	98.8	6.77	0.1	2.09	2.99	0.6	0.26	0.44	54.1	0.012	10.6		Bi	0.253959	-0.0898791	-0.324249	0.261738	-0.118727	0.397611	0.108576	0.0431731	0.489388	0.293297	0.0529335	0.295214	0.172647	0.163557	0.433963	0.0747758	-0.190338	-0.0554051	1
37L-195-g-2''	12ap	5.4	2610	46	1.33	50.8	907	877	121	4.8	68.2	7.8	0.35	1.29	1.89	0.5	0.2	0.438	47.2	0.007	7.6		U	0.643271	-0.0559674	-0.716054	0.112237	0.0395528	0.726685	0.579177	0.227284	0.321576	0.467769	0.0235601	0.411811	0.556663	-0.00836729	0.293666	0.434242	0.0740834	-0.0864747	0.44534	1
37L-195-g-2''	12ap	5.84	1184	46.1	2.51	64	1406	812	52.6	6.1	106.1	6.4	0.1	2.05	2.49	0.75	0.134	1.19	48.1	0.0032	9.89
37L-195-g-2''	12ap	9.21	1319	46.1	3.05	96.2	1700	931	109	5.6	87.8	8.3	0.19	2.86	2.57	0.5	0.2	0.42	57.6	0.022	14.1
37L-195-g-2''	12ap	4.15	1790	46.1	2.29	80.1	980	889	64.7	2.9	100	5.18	0.17	1.66	1.88	0.5	0.19	0.343	31	0.046	10.5
37L-195-g-2''	12ap	8	1254	45.7	1.74	63.6	4500	1550	44.6	6.4	193	4.93	0.049	2.75	3.15	0.1	0.104	0.59	40	0.013	16
37L-195-g-2''	12ap	9	2197	46.1	1.17	26.6	1032	756	45.3	1.2	184	3.64	0.19	1.01	2.63	0.75	0.38	1.26	32.2	0.034	7.77
37L-195-g-2''	12ap	4.64	1400	46.1	4.59	187	1520	1250	48.4	7.2	126	4.06	0.8	1.56	2.55	0.8	0.21	0.54	34.1	0.018	13.6
		V	Mn	Fe, %	Co	Ni	Cu	Zn	As	Se	Mo	Ag	Cd	Sn	Sb	Te	Au	Tl	Pb	Bi	U
37L-195-g-3''	Py2.	9	2240	46.1	2.09	12.5	1780	348	20	3.5	84	4.05	1.11	1.88	1.51	0.22	1.1	88.6	51.6	0.083	8.1
37L-195-g-3''	Py2.	4.06	540	46.3	0.6	3.2	571	118	4.7	2.8	9.4	0.101	0.12	1.08	0.19	0.165	1.29	329	2.01	0.096	12.1
37L-195-g-3''	Py2.	8.5	545	46.4	0.24	1.69	272	97.8	2	1.9	11	0.035	0.3	0.69	0.16	0.165	0.79	221	1.54	0.02	6.98
37L-195-g-3''	Py2.	6.86	621	46.4	0.43	1.58	297	85	1.75	3.5	12	0.097	0.12	0.89	0.13	0.165	1.19	175	1.11	0.038	4.95
37L-195-g-3''	Py2.	6.5	980	46.4	0.023	2.47	104	90	0.52	6	1.01	0.049	0.12	0.22	0.069	0.165	0.48	238	0.19	0.044	2
37L-195-g-3''	Py2.	8.37	4450	45.8	2.1	16	2191	232	4.7	2.5	25.8	0.34	0.37	3.78	0.16	0.55	0.36	51.3	7.45	0.049	25.7
37L-195-g-3''	Py2.	8.34	1740	46.1	1.18	8.4	2210	187	3.3	3.5	56.5	0.38	0.13	3.35	0.18	0.165	1.08	187.7	4.32	0.054	25.1
37L-195-g-3''	Py2.	4.08	3750	46	0.45	2.6	1462	93.1	1.4	1.7	7.2	0.3	0.12	2	0.25	0.165	0.203	94	3.92	0.029	7.36
37L-195-g-3''	Py2.	4.42	2598	46.1	1.19	5.5	969	147	3.1	0.41	17.1	1.2	0.12	1.41	0.33	0.165	0.62	185.4	3.5	0.055	14.3
37L-195-g-3''	Py2.	9.8	1920	45.7	2.11	10.2	5730	295	7.5	3.4	49.7	0.68	0.11	10.7	0.42	0.435	1.15	232	23	0.032	29.1
37L-195-g-3''	Py2.	13.6	3510	46	0.53	5.9	804	521	10.5	2.34	44.8	1.13	3	5.24	1.08	0.165	1.2	333	3.58	0.036	15.29
37L-195-g-3''	Py2.	13.37	3270	46.1	0.34	2.56	421	98.7	2.41	3	9.67	0.86	0.34	2.12	0.115	0.165	0.66	268	1.13	0.028	5.26
37L-195-g-3''	Py2.	11.9	960	46.3	0.41	2.5	750	150	7.1	2.5	29.8	0.84	0.12	3	0.43	0.165	1.87	165.8	4.1	0.1	8.8
37L-195-g-3''	Py2.	5.32	190.3	46.5	0.16	3	173	70.2	1.53	5.6	5.5	0.092	0.67	0.4	0.057	0.7	0.68	187.6	0.56	0.058	4.03
37L-195-g-3''	Py2.	11.29	2267	46.2	1.53	12.3	720	281	24.6	3.9	79.7	2.53	1.74	1.75	1.7	0.165	0.9	107.8	30.9	0.041	3.36
37L-195-g-3''	Py2.	0.2	65	46.5	0.1	0.41	21	11.1	3	0.61	1.58	0	0.12	0.23	0.002	0.165	0.153	0.26	0.22	0.071	0.075
37L-195-g-3''	Py2.	1.47	1880	46.2	2.96	18.2	830	35	21.7	1.6	26.7	3.96	0.12	1.33	9.3	0.165	0.04	1.8	33.7	0.021	13.4
37L-195-g-3''	Py2.	0.67	2050	46.3	0.24	1.6	113	43	108	4.5	27	6.2	0.12	3.2	48.2	2.15	0.2	6.58	15.3	0.24	3.3
37L-195-g-3''	Py2.	0.61	156	46.5	0.082	1.9	180	43.5	0.72	0.18	6.3	0	0.52	1.02	0.052	0.165	0.2	3.7	0.46	0.054	0.76
37L-195-g-3''	Py2.	0.125	150	46.5	0.34	1.9	40.7	6.2	0.06	0.85	0.49	0.13	0.12	0.1	0.001	0.165	0.14	0.32	0.67	0.023	1
37L-195-g-3''	Py2.	9.94	485	46.3	0.89	8.6	1419	210	18.2	0.85	252	1.7	0.24	5.39	1.49	0.165	0.25	7.97	12.43	0.03	10.3

## Sheet: Table 5
Table 5. Trace element contents in pyrite varieties of marcasite-pyrite microfacies. Pobeda-2 hydrothermal field.
	foto	SelectionLabel		V	Mn	Fe, %	Co	Ni	Cu	Zn	As	Se	Mo	Ag	Cd	Sn	Sb	Te	Au	Tl	Pb	Bi	U			V	Mn	Fe, %	Co	Ni	Cu	Zn	As	Se	Mo	Ag	Cd	Sn	Sb	Te	Au	Tl	Pb	Bi	U
37/107-10''	48	Ms1c		1.86	939	46.4	6.98	8.3	98.8	269	29.5	10	80	4.12	0.42	0.98	1.02	1.45	0.001	9.7	2.48	0.054	0.67		V	1
37/107-10''	54	Ms1c		1.52	536	46.4	0.72	1.31	206	89	11.3	7	84.2	0.1	0.2	0.07	0.71	1.8	0.07	2.06	1.31	0.003	0.205		Mn	0.358838	1
37/107-10''	55	Ms1c		1.04	545	46.4	0.9	1.85	111	89.1	10.9	6	34.5	3.66	0.03	1.66	0.34	1	0.032	1.38	2.84	0.062	0.37		Fe, %	-0.479699	-0.85167	1
37/107-10''	56	Ms1c		2.81	1063	46.3	2.2	3.7	267	197	44.9	2.85	60.5	20.4	0.65	8.8	1.02	0.9	0.117	9	17.3	0.37	1.97		Co	0.392375	0.0230286	-0.120035	1								Msall
37/107-10''	57	Ms1c		2.47	880	46.4	3.1	2.82	223	124	41.1	6	70.4	18.9	0.405	5.8	1.14	0.85	0.1	14.8	13.6	0.33	1.19		Ni	0.299131	0.0193966	-0.0823615	0.927613	1
37/107-10''	58	Ms1c		1.72	1840	46.3	1.72	5.1	33	376	29.2	7.5	78.9	3.67	0.325	1.1	1.09	2.2	0.08	4.2	4.08	0.14	0.31		Cu	0.765846	0.0588317	-0.349132	0.424197	0.309394	1
37/107-10''	62	Ms1c		1.22	616	46.4	0.4	1.35	246	94	15.1	6.5	95.3	25.6	0.485	0.62	0.19	0.8	0.002	4.47	2.6	0.023	0.34		Zn	0.144853	0.0584137	-0.145417	0.635417	0.574619	0.1295	1
37/107-10''	68	Ms1c		2.82	4120	46.1	0.08	0.445	2.18	80	41.2	2.85	218.9	0.012	0.2	0.22	0.014	1.75	0.035	6.5	0.46	0.081	0.91		As	0.804709	0.186358	-0.355276	0.455299	0.311752	0.782974	0.173883	1
37/107-10''	69	Ms1c		0.69	1054	46.4	0.045	0.38	12.8	25.2	4.4	4.2	39.6	0.64	0.2	0.17	0.09	0.00377	0.045	1	1.39	0.082	0.013		Se	-0.136647	-0.109052	0.0185492	0.0790504	0.098568	-0.0174269	0.130299	-0.042984	1
37/107-10''	72	Ms1c		0.37	1571	46.3	0.071	0.04	99.8	10	4.1	6	35.2	0.97	0.19	0.37	0.12	0.0371	0.025	0.219	0.3	0.047	0.014		Mo	0.218877	0.320931	-0.239665	-0.0681689	-0.0945382	-0.0897114	-0.057899	0.117325	-0.212665	1
37/107-10''	73	Ms1c		0.72	1885	46.3	0.068	0.61	5.5	23.4	5	5.5	53.4	0.27	0.55	0.17	0.2	0.055	0.062	0.96	0.99	0.055	0.032		Ag	0.689575	0.138763	-0.364333	0.428331	0.331992	0.854676	0.164709	0.733838	-0.033001	-0.130785	1
37/107-10''	74	Ms1c		0.45	1545	46.3	0.09	0.06	34.4	13	9.6	7	47.2	14.9	0.3	0.18	0.19	0.0634	0.044	0.57	1.66	0.038	0.024		Cd	-0.125495	-0.0294991	0.0842994	0.185439	0.136587	-0.0984938	0.105335	0.0131216	-0.0898286	0.113185	-0.0543136	1
37/107-10''	78	Ms1c		2.74	3820	46.1	0.11	0.54	12.2	103	37.2	4.8	161.9	1.53	0.75	0.04	0.23	0.1658	0.05	5.6	1.11	0.106	2.04		Sn	0.826171	0.093451	-0.302678	0.362732	0.203529	0.885698	0.108907	0.867667	-0.0794372	-0.0529988	0.768964	0.00386622	1
37/107-10''	81	Ms1c		8.61	1470	46.2	4.7	2.7	992	566	137	4.4	91.5	47.5	0.315	37.5	0.61	0.243	0.029	2.54	61.3	1.1	3.67		Sb	0.169306	-0.129917	-0.0268468	0.489701	0.501725	0.240568	0.241153	0.128075	0.241021	-0.0643981	0.166206	-0.0631462	0.116017	1
37/107-10''	82	Ms1c		2.18	1578	46.1	3.2	3.1	410	171	54	4.35	59.4	29.8	0.2	4.8	0.83	0.338	0.26	2.92	15	1.19	1.57		Te	-0.212152	-0.272828	0.249774	0.165257	0.176162	-0.170752	0.328337	0.0129283	0.383391	0.0992018	-0.2059	0.271903	-0.137457	0.081313	1
37/107-10''	87	Ms1c		1.07	2260	46.3	0.25	0.87	36.9	23.8	9	0	82	8.39	0.365	2.48	0.18	0.338	0.07	2.15	7.39	0.171	0.142		Au	-0.0390668	0.0363088	-0.173138	0.219979	0.171088	0.0597022	0.234209	0.218346	0.00751626	-0.107172	0.132188	0.121189	0.0136818	0.0273847	0.328105	1
37/107-10''	88	Ms1c		0.73	907	46.4	0.19	0.445	19.8	12.7	4.8	2.1	42	0.92	0.4	-0.02	0.22	0.9	0.065	0.65	0.71	0.081	0.029		Tl	0.0844076	-0.0149229	-0.0138247	0.28825	0.271577	0.0979163	0.139685	0.29023	-0.049638	0.175308	0.103444	0.0445827	0.0682179	0.202923	0.0921044	0.226145	1
																									Pb	0.815852	0.113412	-0.338789	0.41715	0.260886	0.906482	0.15683	0.886125	-0.106239	-0.0704643	0.815192	-0.030402	0.978323	0.157506	-0.141766	0.120734	0.193697	1
																									Bi	0.653432	0.185026	-0.473869	0.394332	0.253891	0.794477	0.0705342	0.749387	-0.129065	-0.089516	0.769558	-0.0270994	0.755517	0.22321	-0.192833	0.343097	0.0604295	0.805484	1
																									U	0.723673	0.194568	-0.36429	0.486084	0.400756	0.648643	0.207726	0.695838	-0.102593	0.134589	0.672422	-0.034667	0.63023	0.381825	-0.0562985	0.152701	0.18877	0.67274	0.593369	1
				V	Mn	Fe, %	Co	Ni	Cu	Zn	As	Se	Mo	Ag	Cd	Sn	Sb	Te	Au	Tl	Pb	Bi	U
37/107-10''	59	Ms12radial		4.1	560	46.4	2.46	4.27	489	229	49.9	5.5	35.4	41.9	0.2	10.3	0.89	1	0.03	2.91	19.3	0.39	3.07
37/107-10''	41	Ms12rad		1.99	398	46.5	2.82	5.7	13	100	17.1	3.7	85.3	0.22	0.465	0.25	0.77	1	0.05	2.56	0.31	0.04	0.19
37/107-10''	42	Ms12rad		1.59	392	46.5	2.22	3.2	12.8	120	15	2.2	59.5	0.62	0.05	0.24	1.02	1	0.06	2.27	0.45	0.021	0.2
37/107-10''	43	Ms12rad		0.56	431	46.4	0.36	0.47	5.9	231	17.2	13.5	80.1	0.069	0.2	0.2	1.68	2.95	0.016	4.07	0.1	0.014	0.162
37/107-10''	44	Ms12rad		0.63	682	46.4	0.68	1.25	5.1	129	14.6	6	60.8	0.26	0.2	0.27	1.32	0	0.075	3.29	0.26	0.028	0.29
37/107-10''	45	Ms12rad		1.26	348	46.4	0.97	1.28	131	131	19.8	3.95	99.9	0.89	0.46	0.39	1.67	1.65	0.036	6.47	3.38	0.178	0.45
37/107-10''	46	Ms12rad		1.43	1304	46.4	9.3	9.7	73.1	3270	30.9	8	61.7	10.3	0.85	0.06	1.04	4.1	0.155	7.5	4.64	0.051	1.01
37/107-10''	47	Ms12rad		1.49	483	46.4	3.23	4.1	71.1	146	21.5	8	46.5	2.63	0.55	1.22	0.59	1.45	0.019	4.41	2.55	0.056	0.57
37/107-10''	49	Ms12rad		1.46	327	46.3	0.85	1.35	5.2	1890	10.1	6	71.7	0.08	0.2	0.4	0.71	3.55	0.07	1.94	1.26	0.027	0.77
37/107-10''	50	Ms12rad		0.5	792	46.4	0.39	0.2	4.2	29.9	18.1	15.5	90.9	0.4	0.2	0.27	1.56	2.9	0.055	3.12	0.23	0.075	0.14
37/107-10''	51	Ms12rad		0.55	448	46.4	2.18	1.8	13.3	63	20.6	3.7	137	0.78	1.85	2.8	0.51	2.95	0.11	4.4	2.1	0.15	0.11
37/107-10''	52	Ms12rad		2.24	199	46.5	4.5	4.9	73.9	85	20	1.6	135	5.67	0.55	0.29	2.05	2.35	0.067	2.8	2.57	0.23	3.3
37/107-10''	53	Ms12rad		1.38	420	46.4	0.47	1.86	331	96	7.7	8	87.2	0.067	0.2	0.34	1.18	1	0.022	2.81	1.37	0.027	0.029
37/107-10''	60	Ms12rad		1.23	338	46.5	0.35	0.37	25.4	104	16.3	4.9	81.5	1.42	0.39	0.83	1.18	1.3	0.061	3.2	2.57	0.047	0.72
37/107-10''	61	Ms12rad		1.71	679	46.4	0.81	0.88	99	104	15.4	5.5	95.6	4.7	0.18	1.57	0.61	1	0.049	2.32	2.77	0.051	1.36
37/107-10''	63	Ms12rad		1.27	470	46.4	0.54	1.25	43	104	14.5	5.5	112.6	0.52	0.255	0.21	0.97	0.5	0.025	6.3	3.18	0.026	2.22
37/107-10''	64	Ms12rad		1.84	819	46.4	0.066	1.06	8.8	23.1	11.1	8.5	53	0.32	0.23	0.46	0.5	0.65	0.055	2.44	0.17	0.117	0.31
37/107-10''	65	Ms12rad		2.17	1050	46.4	0.47	0.15	14	24.1	18.6	0.1	111.9	0.22	0.2	0.18	0.45	1.35	0.023	2.23	0.63	0.129	0.101
37/107-10''	66	Ms12rad		1.9	775	46.4	0.11	0.11	17.4	23.9	9.9	9.5	51.5	1.17	0.215	0.31	0.6	0.6	0.034	0.45	0.46	0.022	0.104
37/107-10''	67	Ms12rad		1.21	849	46.4	0.071	0.51	5	17.1	8.3	5.5	53.5	0.19	0.205	0.09	0.28	0.55	0.02	1.13	0.26	0.037	0.131
37/107-10''	70	Ms12rad		1.09	275	46.5	0.02	0.75	4.2	22.7	5.6	5.5	50.9	0.18	0.2	0.34	0.35	0.0155	0.008	0.075	0.15	0.131	0.18
37/107-10''	71	Ms12rad		2.29	543	46.4	0.22	0.62	40.2	32.9	24.1	2.3	57.5	2.46	0.55	1.91	0.48	0.0335	0.065	1.16	1.2	0.135	0.38
37/107-10''	75	Ms12rad		0.95	466	46.5	0.083	0.02	17.4	16.9	7.1	5.1	53.9	2.63	0.55	0.31	0.31	0.0971	0.035	0.74	0.59	0.039	0.028
37/107-10''	76	Ms12rad		1.46	910	46.4	0.49	0.91	13.2	29.4	14.5	2.75	81.2	0.93	0.23	0.3	0.48	0.131	0.065	0.99	2.39	0.088	0.13
37/107-10''	77	Ms12rad		1.12	891	46.4	0.12	0.52	5.6	18.7	6.4	6	61.4	0.14	0.5	0.19	0.21	0.1481	0.036	0.76	0.41	0.076	0.02
37/107-10''	79	Ms12rad		1.07	1338	46.4	0.16	0.48	2.8	30.8	10.1	1.3	54.7	0.36	0.25	0.28	0.53	0.188	0.032	0.3	0.49	0.098	0.026
37/107-10''	80	Ms12rad		3.16	2370	46.3	0.13	0.425	6.6	22.3	18.8	4.65	116.2	1.06	0.35	0.02	0.35	0.206	0.08	1.04	1.42	0.008	0.253
37/107-10''	83	Ms12rad		1.35	1164	46.4	0.83	1.26	42.8	48.4	13	5.5	67.8	5.86	0.55	0.87	0.75	0.272	0.055	0.263	1.43	0.159	0.22
37/107-10''	84	Ms12rad		3.4	2730	46.2	0.35	0.8	6.1	180	17.4	6	168	7.85	0.2	0.12	0.35	0.299	0.055	2.66	0.66	0.016	1.33
37/107-10''	85	Ms12rad		1.37	148.6	46.5	0.57	0.53	54.6	58.7	39.8	6.5	70	16.19	0.24	1.35	0.46	0.277	0.04	0.7	2.04	0.082	0.88
37/107-10''	86	Ms12rad		1.69	1758	46.3	0.33	0.51	29.4	28.1	9.8	7.5	84.9	8.3	0.35	0.19	0.46	0.305	0.016	1.13	1.79	0.192	0.078
				V	Mn	Fe%	Co	Ni	Cu	Zn	As	Se	Mo	Ag	Cd	Sn	Sb	Te	Au	Tl	Pb	Bi	U
37/107-10''	20	Ms2'		1.56	477	46.4	0.14	0.46	43	117	12.6	3.5	229	0.5	0.465	0.16	0.1	1.3	0.074	6.02	0.6	0.018	0.026
37/107-10''	21	Ms2'		1.15	335	46.5	0.05	0.48	6.6	18.4	11.5	4.9	55.4	1.86	0.5	0.4	0.26	2.4	0.046	1	0.97	0.0325	0.118
37/107-10''	22	Ms2'		1.11	272	46.5	0.1	0.75	7	16.9	18.2	4.6	127.9	0.88	0.13	0.14	0.2	1.05	0.026	3.81	0.54	0.013	0.072
37/107-10''	23	Ms2'		0.42	498	46.5	0.195	0.18	1.8	19.5	21.1	2.9	57	0.19	0.48	0.04	0.11	0.1	0.07	1.15	0.19	0.0335	0.39
37/107-10''	24	Ms2'		1.35	370	46.5	0.21	0.02	1.8	24.2	18.4	1.9	186.4	0.03	0.65	0.255	0.16	1	0.019	3.97	0.55	0.014	0.029
37/107-10''	25	Ms2'		1.18	353	46.5	0.07	0.27	1.7	21.8	15.7	6	106.7	0.1	0.12	0.07	0.19	3	0.075	3.96	0.69	0.016	0.062
37/107-10''	26	Ms2'		0.66	128.1	46.5	0.15	0.12	17.8	17.5	32.9	1.65	60.6	1.27	0.32	0.41	0.28	0.85	0.13	26.4	8.7	0.023	0.36
37/107-10''	27	Ms2'		0.2	428	46.5	0.09	0.24	0.8	8.8	14.6	8	46.9	0.03	0.75	0.01	0.225	4.7	0.115	0.99	0.24	0.0355	0.056
37/107-10''	28	Ms2'		0.76	227.1	46.5	0.05	0.02	1.9	13.2	16.4	6.5	80	0.17	0.245	0.1	0.09	0	0.05	1.32	0.2	0.04	0.17
37/107-10''	29	Ms2'		0.73	501	46.5	0.12	0.31	1.1	19	16.6	0.1	86.7	0.024	0.28	0.24	0.13	1.65	0.034	1.5	0.15	0.025	0.27
37/107-10''	30	Ms2'		0.93	218	46.5	0.18	0.25	16.9	10.7	10.8	6.5	83.1	0.85	0.29	0.11	0.145	1.2	0.05	2.14	0.13	0.018	0.133
37/107-10''	31	Ms2'		0.62	743	46.4	0.06	0.11	2.25	25	15.5	5.5	72.9	0.038	0.75	0.2	0.06	2	0.035	1.72	0.17	0.013	0.007
37/107-10''	32	Ms2'		0.9	51.6	46.5	0.07	0.2	1.1	6.5	15.1	8.5	55	0.275	0.55	0.03	0.2	2.95	0.075	2.54	1.05	0.096	0.0215
37/107-10''	33	Ms2'		1.32	577	46.4	0.03	0.8	1.5	24.1	16	6	128.6	0.051	0.2	0.08	0.11	3.55	0.04	3.07	0.34	0.003	0.095
37/107-10''	34	Ms2'		1.01	610	46.4	0.2	0.56	16.8	20.9	22.2	2.65	109.7	2.11	0.29	0.09	0.11	1	0.049	1.68	1.4	0.012	0.63
37/107-10''	35	Ms2'		1	722	46.4	0.255	0.46	10.7	12.2	25.4	10.5	52.3	1.04	0.2	0.375	0.06	4.5	0.23	0.52	1.76	0.007	1.01
37/107-10''	36	Ms2'		0.88	602	46.4	0.36	0.9	11.4	20.4	20.6	4	81.9	1.07	0.75	0.1	0.16	1.7	0.105	1.2	1.45	0.003	0.44
37/107-10''	37	Ms2'		1.25	242	46.5	0.185	1.3	3.5	15.5	44.7	8.5	93.4	0.25	0.2	0.34	0.04	3.65	0.1	7.7	1.01	0.07	0.32
37/107-10''	38	Ms2'		0.85	530	46.5	0.23	0.85	2.8	13.4	17.7	6	61.5	0.84	1.4	1.26	0.17	2.55	0.024	0.79	0.88	0.045	0.084
37/107-10''	39	Ms2'		0.63	335	46.5	0.09	0.7	1.7	16	18.3	7	106.7	0.44	0.85	0.18	0.26	3.7	0.055	1.62	0.53	0.02	0.168
37/107-10''	40	Ms2'		0.97	205	46.5	0.27	0.46	40	29.9	22.3	4.75	84.9	1.7	0.2	0.23	0.03	1.35	0.06	1.87	1.98	0.048	0.084
	№foto			V	Mn	Fe%	Co	Ni	Cu	Zn	As	Se	Mo	Ag	Cd	Sn	Sb	Te	Au	Tl	Pb	Bi	U			V	Mn	Fe, %	Co	Ni	Cu	Zn	As	Se	Mo	Ag	Cd	Sn	Sb	Te	Au	Tl	Pb	Bi	U
37/107-10	1	Py1ap		3.69	7.05	46.3	154.4	108.8	1080	57.8	301.2	48.4	68.7	48.6	0.51	2.09	2.87	1.25	0.577	7.15	150.3	2.14	9.46		V	1
37/107-10	2	Py1ap		4.06	2.61	46.3	166.2	110.1	1012	37.1	287	46.3	56.5	57.9	0.49	1.82	2.56	1.07	0.471	6.74	126.1	1.254	6.99		Mn	-0.267393	1
37/107-10	3	Py1ap		4.28	3.3	46.3	158.7	98.3	1310	42.8	346	27.6	78.2	45	0.56	2.54	2.63	0.245	0.85	14.43	219.1	2.25	10.8		Fe, %	-0.182957	-0.129676	1
37/107-10	4	Py1ap		4.72	2.96	46.3	188.3	125.1	1174	52.6	288	74.7	77.6	63	0.53	2.58	2.58	1.21	0.748	10.66	198	4.17	7.62		Co	0.274603	-0.482806	-0.41101	1							Pyall
37/107-10	5	Py1ap		3.41	2.23	46.3	169.1	113.4	1160	33.7	239.3	87.5	57.5	27.5	0.65	1.75	2.29	0.63	0.488	11.33	133.9	2.49	5.7		Ni	0.301873	-0.478826	-0.418148	0.957212	1
37/107-10	6	Py1ap		3.19	1.73	46.4	147.3	95.2	785	20.7	203	66	56.3	25.6	0.38	1.58	1.61	0.6	0.493	11.66	107.8	1.51	1.84		Cu	0.0638692	0.254276	-0.945324	0.186699	0.215269	1
37/107-10	7	Py1ap		4.39	2.55	46.3	168.3	105.6	1033	50.8	276.4	40.8	108.6	26.24	0.53	1.36	2.11	1.59	0.715	11.99	173.7	2.09	8.7		Zn	0.0334522	0.101996	-0.664397	0.244463	0.186929	0.639061	1
37/107-10	8	Py1ap		3.76	2.09	46.3	180	113.7	1140	30.7	455	95.8	67.5	92.7	0.84	2.37	4.85	0.98	0.561	8.34	225.5	1.78	4.51		As	0.434814	-0.378502	-0.362521	0.636533	0.677999	0.15029	0.137431	1
37/107-10	9	Py1ap		3.93	1.68	46.3	163.7	81.5	1072	240	213	56.9	45.8	7.07	0.96	2.04	1.64	0.39	0.488	8.16	196.7	1.026	0.925		Se	0.284622	-0.486806	-0.360821	0.766264	0.830351	0.230434	0.258823	0.574254	1
37/107-10	10	Py1ap		2.75	42	46.3	147	71	903	371	162	36.2	141	10.1	1.63	1.54	1.07	1.31	0.286	4.74	139	3.27	1.92		Mo	0.241967	0.100753	-0.267165	-0.0615898	-0.055562	0.163273	0.348076	0.309788	-0.0892894	1
37/107-10	11	Py1ap		4.24	1.98	46.3	163	78.3	983	119	230	34.1	61.3	15.1	0.66	1.62	1.63	1.62	0.444	7.74	194.4	1.83	1.33		Ag	0.315551	-0.31245	-0.278991	0.620979	0.731693	0.123487	-0.05507	0.789686	0.647153	0.0345451	1
37/107-10	12	Py1ap		3.62	2.56	46.3	171.9	79.8	908	106.6	198	36.6	173	8.81	0.43	1.47	1.14	1.73	0.418	6.38	168.5	2.97	3.43		Cd	0.181437	-0.246864	-0.539152	0.727346	0.694939	0.363265	0.673533	0.548393	0.59036	0.194227	0.452384	1
37/107-10	13	Py1ap		3.9	2.81	46.3	191.8	80.1	844	74.4	149.3	39.3	56	32.6	0.57	1.86	1.27	1.18	0.4	4.67	170.7	3.75	9.9		Sn	0.332103	-0.291735	-0.360105	0.637747	0.572991	0.244113	0.347805	0.659476	0.483048	-0.0071238	0.411486	0.519296	1
37/107-10	14	Py1ap		3.42	1.73	46.3	213.5	93.4	925	89.3	203.9	57.1	43.9	16.08	0.39	3.87	1.16	1.8	0.456	7.98	205	2.46	1.69		Sb	0.466766	-0.217481	-0.51688	0.558249	0.647687	0.409095	0.215389	0.83984	0.642901	0.14974	0.85284	0.536787	0.564215	1
37/107-10	15	Py1ap		3.28	1.37	46.3	184	81.7	1025	97	254	56	46	17.5	0.53	2.16	1.42	0.81	0.435	8.35	176.6	4.52	1.56		Te	0.281775	-0.30401	-0.523652	0.745838	0.71301	0.306004	0.333256	0.454737	0.535501	0.215012	0.435057	0.585305	0.338976	0.407239	1
37/107-10	16	Py1ap		3.26	4.8	46.3	178.3	84.2	920	69.7	176.9	38.7	67.3	17.63	0.49	2.13	1.131	0.77	0.398	6.37	165.2	2.34	5.89		Au	0.409383	-0.432774	-0.328255	0.73012	0.767777	0.109198	0.14067	0.89865	0.579823	0.261618	0.734922	0.540504	0.620113	0.715511	0.521123	1
37/107-10	17	Py1ap		2.49	1.19	46.3	202	90.8	1037	68.3	270	42.4	41.5	11.69	0.55	3.31	1.51	1.17	0.452	10.32	183	1.84	1.16		Tl	-0.14425	0.3027	-0.151582	0.0492255	0.0945549	0.0579076	-0.0675538	0.411813	-0.0932938	0.255987	0.183349	0.0613694	0.149242	0.126625	0.0175964	0.428283	1
37/107-10	18	Py1ap		3.92	10	46.2	219	108.4	2300	256	359	62.2	50.2	26.2	0.89	10.3	2.95	0.63	0.624	10	190	2.82	3.51		Pb	0.40447	-0.398783	-0.46841	0.866596	0.832186	0.227085	0.307872	0.813667	0.648414	0.189919	0.69774	0.691529	0.636711	0.708142	0.694069	0.88	0.214397	1
37/107-10	19	Py1ap		2.04	1.7	46.3	183.7	92.5	1065	50.7	277.8	48.5	37.9	28	0.75	3.86	1.96	0.94	0.492	11.62	117.2	1.62	1.47		Bi	0.200039	-0.223448	-0.572791	0.492969	0.468933	0.449619	0.463384	0.301601	0.480578	0.134218	0.329757	0.448562	0.312778	0.336315	0.565943	0.393737	-0.0890646	0.523227	1
37/107-10	20	Py1ap		2.06	1.31	46.3	201.7	102.6	1106	41.9	294.2	40.5	37.6	34.7	0.87	2.78	2.27	0.94	0.494	11.93	139.3	1.727	1.23		U	0.0735871	0.600288	-0.600446	-0.263218	-0.213844	0.73263	0.336173	-0.137746	-0.181677	0.179693	-0.0540888	-0.0658976	-0.128407	0.20921	-0.0177154	-0.174472	0.0229472	-0.1077	0.173155	1
				V	Mn	Fe%	Co	Ni	Cu	Zn	As	Se	Mo	Ag	Cd	Sn	Sb	Te	Au	Tl	Pb	Bi	U
37/107-10	21	Py2'		1.21	46	46.5	14.9	8.6	186	10.9	59	12	34.3	0.31	0.08	0.18	0.8	0.1	0.016	2.57	13.3	0.15	1.05
37/107-10	22	Py2'		1.26	119	46.5	86	19.4	110	12.9	35.4	13.5	51	1.1	0.3	0.33	0.69	0.08	0.035	1.29	14.1	0.144	1.42
37/107-10	23	Py2'		1.44	32.1	46.5	22.1	11.2	340	18.3	84.8	21.2	38.7	2.97	0.19	0.98	0.666	0.01	0.087	4.34	28.2	0.153	5.6
37/107-10	24	Py2'		3.06	18.4	46.5	16.8	7.94	151	8.1	93.9	11.8	51.1	0.71	0.15	0.115	1.06	0.38	0.026	2.79	14.9	0.48	23.2
37/107-10	25	Py2'		2.37	429	46.5	1.6	0.64	85.5	33.9	26.9	1.07	39.1	0.241	0.055	0.174	0.542	0.1	0.017	15	2.15	0.0267	26
37/107-10	26	Py2'		2.22	285	45.7	19	14.5	7200	328	89	18.7	107	2.57	0.5	0.62	2.43	0.8	0.036	9.4	57	3.4	66
37/107-10	27	Py2'		6.18	6.5	46.4	30.3	12.4	429	3.82	130	30.8	51.8	1.11	0.05	0.44	1.22	0.72	0.128	2.42	17.7	2.23	8.6
37/107-10	28	Py2'		3	7.1	46.4	11.5	4.7	880	234	231	54	137	5.9	0.29	1.55	1.78	0.23	0.39	2.95	51	1.76	9.9
37/107-10	29	Py2'		2.1	1.43	46.5	40.7	17.1	127	6.8	44.5	22	28	0.73	0.04	0.24	0.296	0.07	0.036	1.15	2.86	0.65	2.3
37/107-10	30	Py2'		9.1	21.4	46.4	6.55	1.7	710	13.9	191	8.5	101	0.93	0.19	2.3	1.54	0.1	0.2	3.72	27.3	0.51	7.4
37/107-10	31	Py2'		2.64	16.7	46.5	34	19	142	4.64	49.9	16.5	25.8	4.75	0.03	0.27	0.338	0.1	0.048	2.45	15.3	0.169	5.1
37/107-10	32	Py2'		1.24	0.82	46.2	173	104	2440	179	24.4	73.2	12.7	1.68	0.78	0.49	0.22	1.3	0.01	0.71	17.2	2.98	0.59
37/107-10	33	Py2'		2.98	4.75	46.5	109.1	73.2	219	6.6	22.5	51.5	16.8	1.89	0.1	0.23	0.417	0.32	0.011	2.03	10.84	0.92	0.421
37/107-10	34	Py2'		1.38	43.9	46.5	42.8	20.7	141	10.1	37.9	19	32.3	0.89	0.07	0.218	0.532	0.03	0.047	2.12	5.38	0.62	0.56
37/107-10	35	Py2'		1.41	37.1	46.4	10.9	4.36	720	75	81	18	41.4	6.8	0.08	0.25	0.62	0.3	0.128	3.7	38.9	5.62	9.1
37/107-10	36	Py2'		0.889	58.3	46.5	2.81	1.42	239	5.14	57.4	3.6	47.8	0.82	0.0435	0.178	0.387	0.275	0.022	4.54	6.01	0.786	0.66
37/107-10	38	Py2'		1.8	146	46.4	0.0105	0.034	53.7	10.81	224	0.7	171	1.14	0.115	0.154	0.128	0.1	0.199	19.6	26.7	0.0124	0.094
37/107-10	39	Py2'		0.237	25.7	46.5	0.005	0.012	14.7	5.73	147.3	0.1	73.4	0.039	0.024	0.199	0.139	0.09	0.375	22.16	13.3	0.0045	0.197
37/107-10	40	Py2'		1.03	140.3	46.4	3	1.93	570	42	126.6	4.9	49.6	1.58	0.16	0.19	0.307	0.325	0.149	21.2	7.55	0.83	0.64
37/107-10	37	Py2'		5.4	53	46.3	50	20.6	481	31.9	57.9	9.7	1570	1.65	0.18	0.3	0.568	13.5	0.023	3.87	39.5	55	390
